# Supplementary material for: Unidirectional complexation of pillar[4]arene[1]benzoquinoneoxime with alkyl alcohols
Source: Royal Society of Chemistry journal article supplement (doi:10.1039/c9ob00665f), 2019-01-01
Supplement: c9ob00665f1.pdf [file c9ob00665f1.pdf]

## Electronic Supplementary Information

### Table of Contents

|                                                                                                                             |     |
|-----------------------------------------------------------------------------------------------------------------------------|-----|
| General Methods                                                                                                             | S2  |
| Synthetic Procedures                                                                                                        | S2  |
| Scheme S1. Synthesis of <b>3</b> and <b>4</b>                                                                               | S2  |
| Scheme S2. Schematic representation of host-guest interactions between host <b>3</b> and guest <b>G1</b> or <b>G5</b>       | S3  |
| Synthesis of <b>3</b>                                                                                                       | S3  |
| Crystallographic data of <b>EtOAc</b> $\subset$ <b>3</b>                                                                    | S3  |
| Figure S1. <sup>1</sup> H NMR spectrum (500 MHz) of <b>3</b> in CDCl <sub>3</sub>                                           | S4  |
| Figure S2. <sup>13</sup> C NMR spectrum (125 MHz) of <b>3</b> in CDCl <sub>3</sub>                                          | S4  |
| Figure S3. HRMS (ESI) of <b>3</b>                                                                                           | S5  |
| Synthesis of <b>4</b>                                                                                                       | S5  |
| Crystallographic data of <b>4</b>                                                                                           | S5  |
| Figure S4. <sup>1</sup> H NMR spectrum of (500 MHz) of <b>4</b> in CDCl <sub>3</sub>                                        | S6  |
| Figure S5. <sup>13</sup> C NMR spectrum of (125 MHz) of <b>4</b> in CDCl <sub>3</sub>                                       | S6  |
| Figure S6. HRMS (ESI) of <b>4</b>                                                                                           | S7  |
| Stoichiometry and association constant determination for the complexation of <b>3</b> and with Guest <b>G1</b> or <b>G5</b> | S7  |
| Figure S7. 2D NOESY spectrum of the mixture of <b>3</b> and <b>G1</b> in CDCl <sub>3</sub>                                  | S8  |
| Crystallographic data of <b>G1</b> $\subset$ <b>3</b>                                                                       | S9  |
| Figure S8. Job <sup>1</sup> H NMR spectra (500 MHz, CDCl <sub>3</sub> , 298 K) of <b>3</b> and <b>G1</b>                    | S9  |
| Figure S9. Job plot of <b>3</b> and <b>G1</b>                                                                               | S10 |
| Figure S10. 2D NOESY spectrum of the mixture of <b>3</b> and <b>G2</b> in CDCl <sub>3</sub>                                 | S11 |
| Figure S11. Job <sup>1</sup> H NMR spectra (500 MHz, CDCl <sub>3</sub> , 298 K) of <b>3</b> and <b>G2</b>                   | S12 |
| Figure S12. Job plot of <b>3</b> and <b>G2</b>                                                                              | S12 |
| Figure S13. 2D NOESY spectrum of the mixture of <b>3</b> and <b>G3</b> in CDCl <sub>3</sub>                                 | S13 |
| Figure S14. Job <sup>1</sup> H NMR spectra (500 MHz, CDCl <sub>3</sub> , 298 K) of <b>3</b> and <b>G3</b>                   | S14 |
| Figure S15. Job plot of <b>3</b> and <b>G3</b>                                                                              | S14 |
| Figure S16. 2D NOESY spectrum of the mixture of <b>3</b> and <b>G4</b> in CDCl <sub>3</sub>                                 | S15 |
| Figure S17. Job <sup>1</sup> H NMR spectra (500 MHz, CDCl <sub>3</sub> , 298 K) of <b>3</b> and <b>G4</b>                   | S16 |
| Figure S18. Job plot of <b>3</b> and <b>G4</b>                                                                              | S16 |
| Figure S19. 2D NOESY spectrum of the mixture of <b>3</b> and <b>G5</b> in CDCl <sub>3</sub>                                 | S17 |

|                                                                                                              |     |
|--------------------------------------------------------------------------------------------------------------|-----|
| Figure S20. Job <sup>1</sup> H NMR spectra (500 MHz, CDCl <sub>3</sub> , 298 K) of <b>3</b> and <b>G5</b>    | S18 |
| Figure S21. Job plot of <b>3</b> and <b>G5</b>                                                               | S18 |
| Figure S22. <sup>1</sup> H NMR spectra of <b>3</b> upon addition of <b>G1</b> .                              | S19 |
| Figure S23. <sup>1</sup> H NMR spectra of H <sub>OX5</sub> peak shift of <b>3</b> upon addition of <b>G1</b> | S19 |
| Figure S24. The non-linear curve-fitting for the complexation of <b>3</b> with <b>G1</b>                     | S20 |
| Figure S25. <sup>1</sup> H NMR spectra of <b>3</b> upon addition of <b>G2</b>                                | S21 |
| Figure S26. <sup>1</sup> H NMR spectra of H <sub>OX5</sub> peak shift of <b>3</b> upon addition of <b>G2</b> | S21 |
| Figure S27. The non-linear curve-fitting for the complexation of <b>3</b> with <b>G2</b>                     | S22 |
| Figure S28. <sup>1</sup> H NMR spectra of <b>3</b> upon addition of <b>G3</b>                                | S23 |
| Figure S29. <sup>1</sup> H NMR spectra of H <sub>OX5</sub> peak shift of <b>3</b> upon addition of <b>G3</b> | S23 |
| Figure S30. The non-linear curve-fitting for the complexation of <b>3</b> with <b>G3</b>                     | S24 |
| Figure S31. <sup>1</sup> H NMR spectra of <b>3</b> upon addition of <b>G4</b>                                | S25 |
| Figure S32. <sup>1</sup> H NMR spectra of H <sub>OX5</sub> peak shift of <b>3</b> upon addition of <b>G4</b> | S25 |
| Figure S33. The non-linear curve-fitting for the complexation of <b>3</b> with <b>G4</b>                     | S26 |
| Figure S34. <sup>1</sup> H NMR spectra of <b>3</b> at a concentration upon addition of <b>G5</b>             | S27 |
| Figure S35. <sup>1</sup> H NMR spectra of H <sub>OX5</sub> peak shift of <b>3</b> upon addition of <b>G5</b> | S27 |
| Figure S36. The non-linear curve-fitting for the complexation of <b>3</b> with <b>G5</b>                     | S28 |
| Reference                                                                                                    | S28 |

**Materials and Methods:** Unless otherwise noted, all commercial reagents and solvents were used without purification. Flash column chromatography was performed on silica gel (200-300 mesh). <sup>1</sup>H and <sup>13</sup>C NMR spectra were recorded at a 500 MHz spectrometer with TMS as the reference, and 2D H-H NOESY was recorded at a 600 MHz spectrometer. Spectrum Mass spectra (ESI analysis) were recorded on an Esquire 6000 spectrometer (LC/MS). Single crystal X-ray diffraction data were collected on a SMART APEX 2 X-ray diffractometer equipped with a normal focus Mo-target X-ray tube ( $\lambda = 0.71073 \text{ \AA}$ ). Data reduction included absorption corrections by the multi-scan method. The structures were solved by direct methods and refined by full-matrix least-squares using SHELXS-97. All non-hydrogen atoms were refined anisotropically, while hydrogen atoms were added at their geometrically ideal positions and refined isotropically.

**Synthetic Procedures:** Through the reaction, the quinone unit of **2** could be selectively transformed to either pillar[4]arene[1]benzoquinoneoxime (**3**) or pillar[4]arene[1]benzoquinonedioxime (**4**) in good yields.<sup>S1</sup>

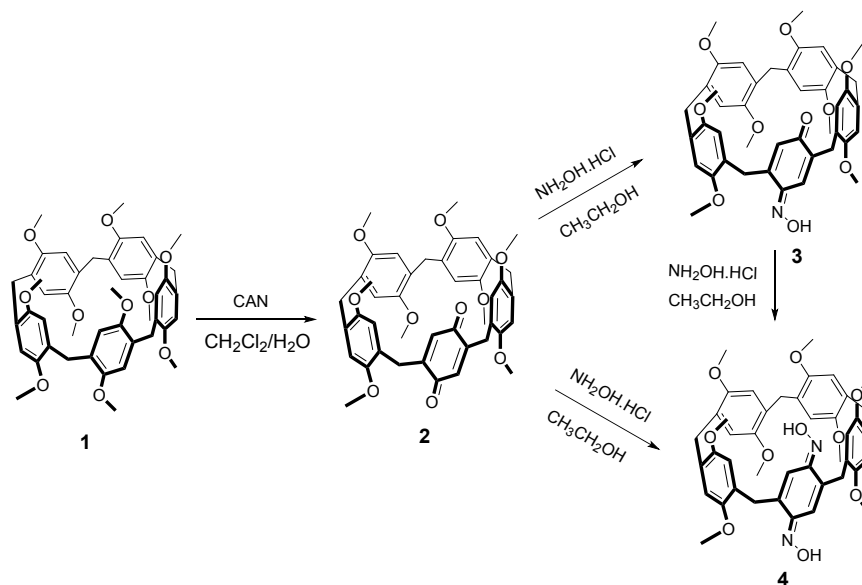

**Scheme S1.** Synthesis of pillar[4]arene[1]benzoquinoneoxime (**3**) or pillar[4]arene[1]benzoquinonedioxime (**4**).

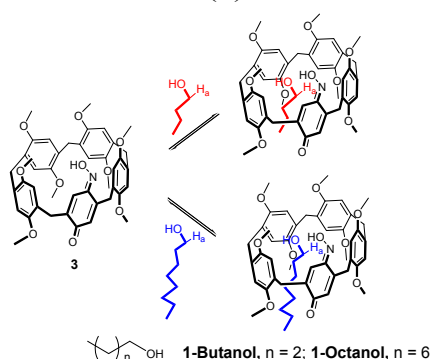

**Scheme S2.** Schematic representation of host-guest interactions between host **3** and guest **G1** or **G5**.

**Synthesis of 3:** To a solution of pillar[4]arene[1]quinone (502.6 mg, 0.70 mmol) in ethanol (25 ml, 95%) was added hydroxylammonium chloride (398.1 mg, 5.73 mmol). The mixture was heated at 78 °C for 2.5 h, then cooled to room temperature, and filtered to remove solid. The filtrate was poured into water (100 mL), and extracted with CH<sub>2</sub>Cl<sub>2</sub> (3 × 20 mL). The combined organic extracts were concentrated under reduced pressure resulting in a residue which was subjected to column chromatography (petroleum ether/CH<sub>2</sub>Cl<sub>2</sub> = 1:100) to afford **3** as red solid (495 mg,

96%).  $^1\text{H}$  NMR (500 MHz,  $\text{CDCl}_3$ ):  $\delta$  7.69(s, 1H), 6.85 (s, 1H), 6.84 (s, 1H), 6.82 (s, 2H), 6.80 (s, 1H), 6.78 (s, 1H), 6.77 (s, 1H), 6.68 (s, 1H), 6.46 (s, 1H), 3.63-3.81 (34H).  $^{13}\text{C}$  NMR (125 MHz,  $\text{CDCl}_3$ ):  $^{13}\text{C}$  NMR (126 MHz,  $\text{CDCl}_3$ , 298K):  $\delta$  187.9, 151.1, 151.0, 150.8, 150.7, 150.7, 150.6, 150.3, 148.0, 141.2, 129.1, 129.1, 128.9, 128.4, 128.3, 127.9, 125.0, 124.9, 121.8, 114.4, 114.3, 114.18, 114.0, 113.9, 113.9, 113.8, 113.8, 56.0, 55.9, 55.8, 55.7, 55.7, 55.6, 52.8, 29.7, 29.52, 29.3, 28.7. HRMS (ESI): calcd for  $\text{C}_{43}\text{H}_{45}\text{NO}_{10}[\text{M} + \text{H}^+] = 736.3166$ , found 736.3151.

**Crystallographic Data of EtOAc **3**:**  $[\text{C}_{47}\text{H}_{53}\text{NO}_{12}]$ ;  $M_r = 823.9$ ;  $T = 173.15\text{K}$ ; monoclinic; space group  $\text{C2/c}$ ;  $a=42.729(8)$   $b=12.651(2)$   $c=16.865(3)$  Å;  $\alpha=90^\circ$ ;  $\beta=95.628(8)^\circ$ ;  $\gamma=90^\circ$ ;  $V = 9073(3)$  Å<sup>3</sup>;  $Z = 8$ ;  $\rho_{\text{calcd}} = 1.206\text{g/cm}^3$ ;  $\mu = 0.087\text{mm}^{-1}$ ; reflections collected 51219; independent reflections 7921; data/restraints/parameters 7921/385/552;  $GOF$  on  $F^2$  1.290;  $R_{\text{int}}$  for independent data 0.1783; final  $R_1 = 0.1310$ ,  $wR_2 = 0.3801$ ; R indices (all data)  $R_1 = 0.2285$ ,  $wR_2 = 0.3451$ ; largest diff. peak and hole: 1.00 and  $-0.72\text{eÅ}^{-3}$ .

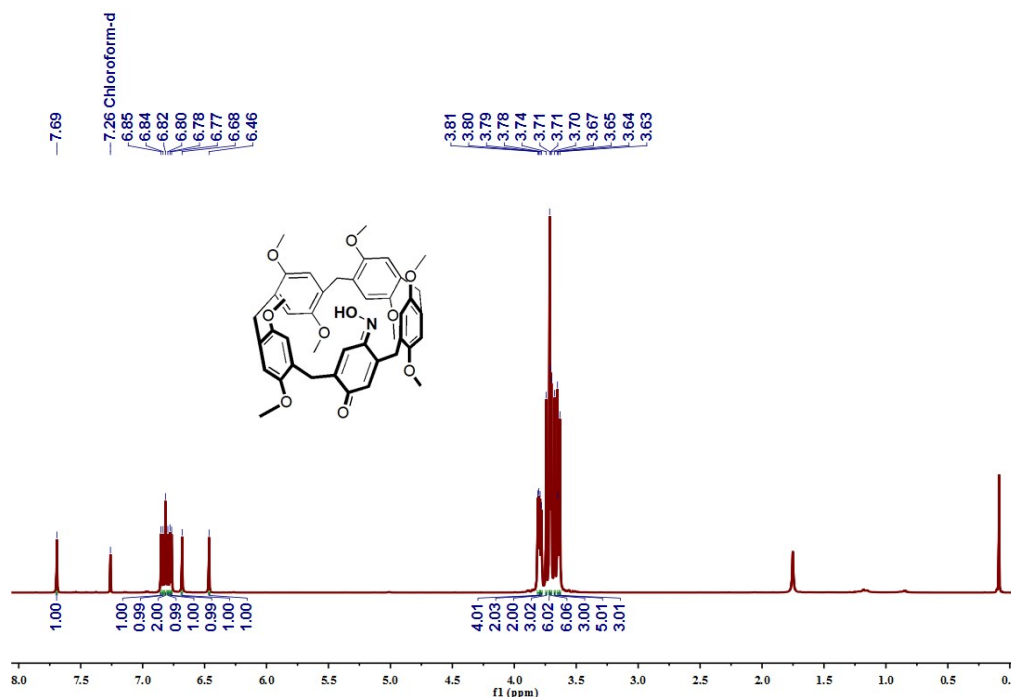

**Figure S1.**  $^1\text{H}$  NMR spectrum (500 MHz) of **3** in  $\text{CDCl}_3$ .

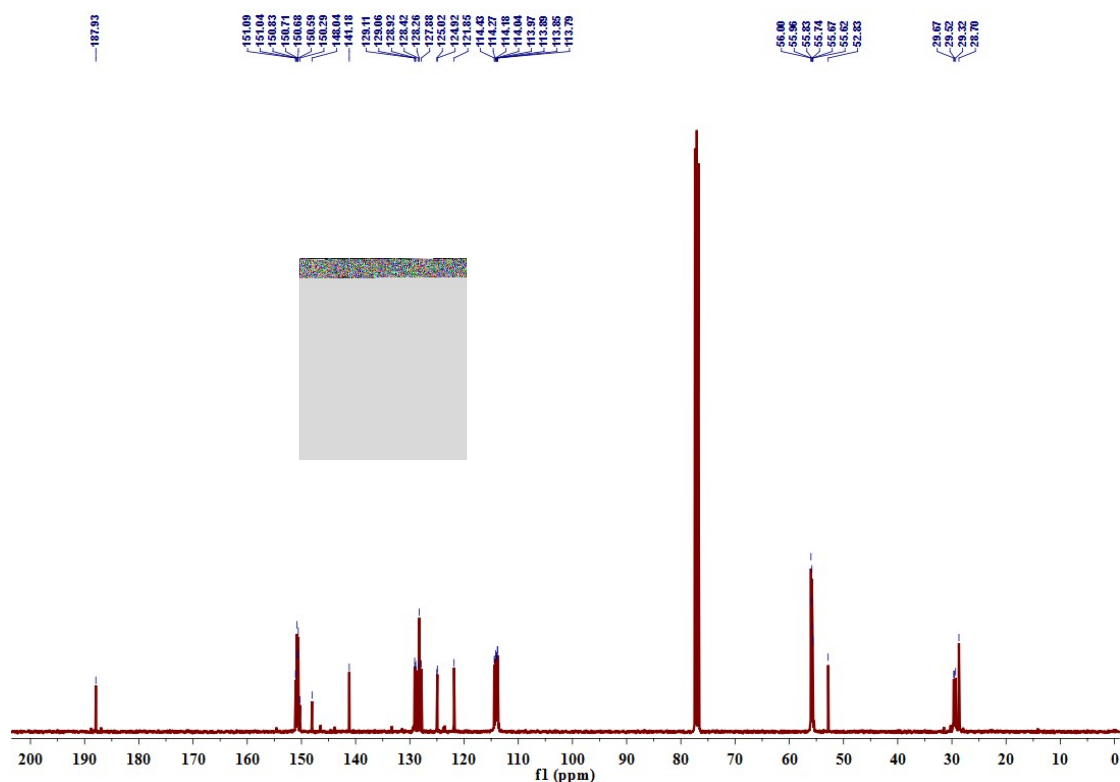

**Figure S2.**  $^{13}\text{C}$  NMR spectrum (125 MHz) of **3** in  $\text{CDCl}_3$ .

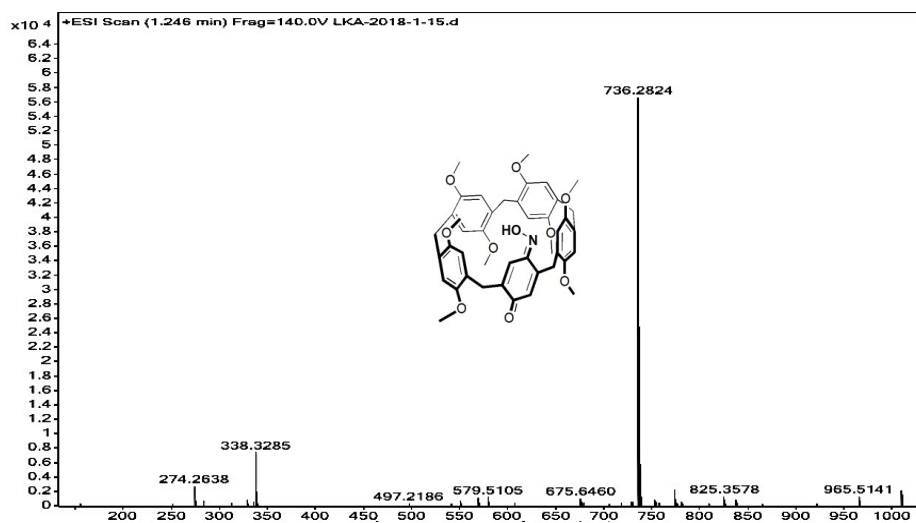

**Figure S3.** HRMS (ESI) of **3**: calcd for  $\text{C}_{43}\text{H}_{45}\text{NO}_{10}[\text{M} + \text{H}^+] = 736.3166$ , found 736.3151

**Synthesis of 4:** To a solution of pillar[4]arene[1]quinone(504.9 mg, 0.70 mmol) in ethanol (25 mL, 95%) was added hydroxylammonium chloride (1.70 g, 24.4 mmol). The mixture was heated at  $78^\circ\text{C}$  for 48 h, then cooled to room temperature, and to remove solid. The filtrate was poured into water (100 mL), and extracted with  $\text{CH}_2\text{Cl}_2$  ( $3 \times 20$  mL). The combined extracts were concentrated under reduced pressure

resulting in a residue which was purified by column chromatography ( $\text{CH}_2\text{Cl}_2/\text{MeOH}$  = 100:1) to afford **4** as red solid (449.6 mg, 88%).  $^1\text{H}$  NMR (500 MHz,  $\text{CDCl}_3$ ):  $\delta$  7.21(s, 2H), 6.80 (s, 2H), 6.76 (s, 4H), 6.73 (s, 2H), 3.62~3.80 (34H).  $^{13}\text{C}$  NMR (125 MHz,  $\text{CDCl}_3$ )  $\delta$  150.7, 150.3, 150.3, 149.9, 139.8, 128.56, 128.1, 127.8, 126.2, 115.9, 113.9, 113.9, 113.7, 113.2, 113.1, 55.4, 55.2, 55.1, 54.9, 54.9, 54.1. HRMS (ESI): calcd for  $\text{C}_{43}\text{H}_{46}\text{N}_2\text{O}_{10}[\text{M} + \text{H}^+] = 751.3225$ , found 751.3268.

**Crystallographic Data of 4:**  $[\text{C}_{43}\text{H}_{46}\text{N}_2\text{O}_{10}]$ ;  $M_r = 750.82$ ;  $T = 193(2)\text{K}$ ; Monoclinic; space group P 2<sub>1</sub>/c;  $a = 21.701(6)$   $b = 8.299(3)$   $c = 23.480(7)$  Å;  $\alpha = 90^\circ$  ;  $\beta = 115.537(4)^\circ$  ;  $\gamma = 90^\circ$  ;  $V = 3815(2)$  Å<sup>3</sup>;  $Z = 4$ ;  $\rho_{\text{calcd}} = 1.307$  g/cm<sup>3</sup>;  $\mu = 0.093$  mm<sup>-1</sup>; reflections collected 23542; independent reflections 7494; data/restraints/parameters 7494/ 4/512;  $GOF$  on  $F^2$  1.031;  $R_{\text{int}}$  for independent data 0.1092; final  $R_1 = 0.0831$ ,  $wR_2 = 0.2074$ ; R indices (all data)  $R_1 = 0.1786$ ,  $wR_2 = 0.2594$ ; largest diff. peak and hole: 1.051 and -0.366 eÅ<sup>-3</sup>.

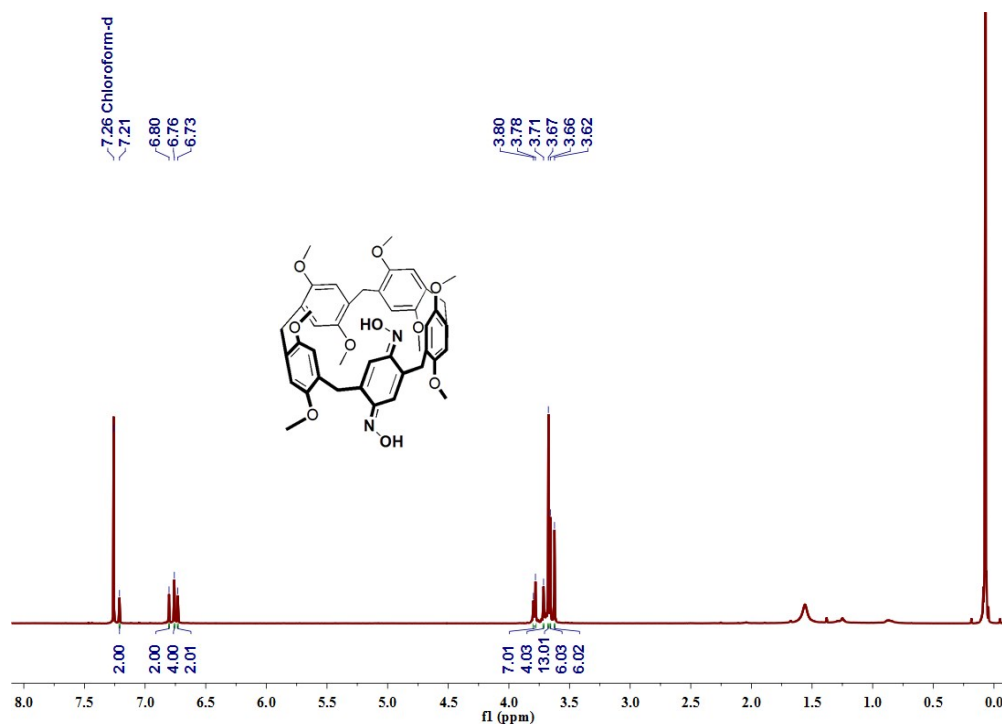

**Figure S4.**  $^1\text{H}$  NMR spectrum (500 MHz) of **4** in  $\text{CDCl}_3$

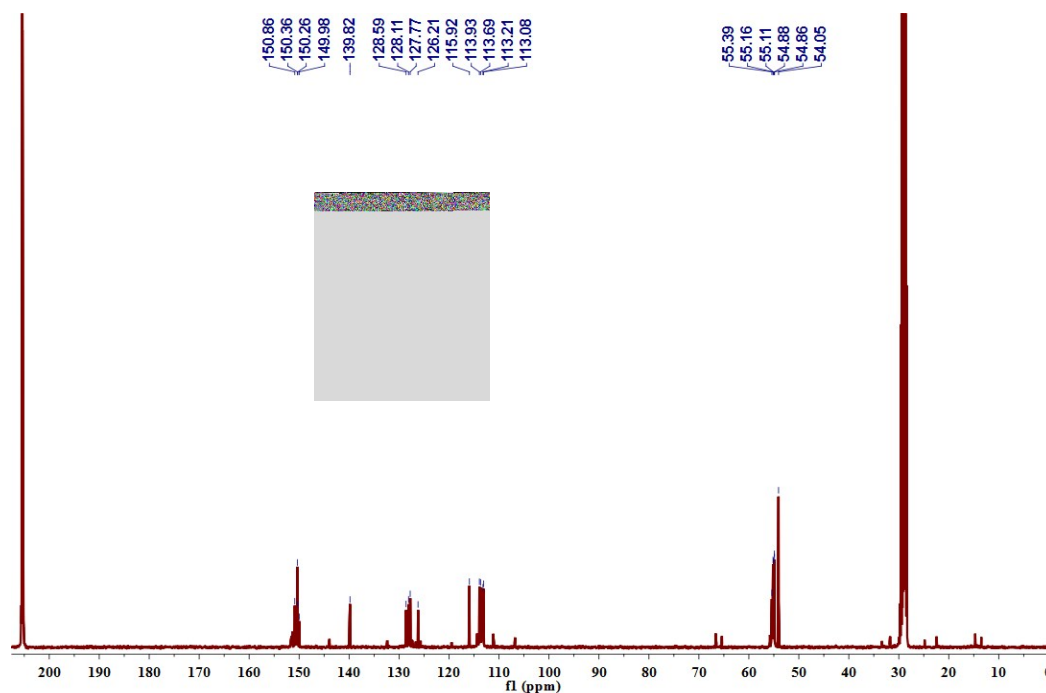

**Figure S5.**  $^{13}\text{C}$  NMR spectrum (125 MHz) of **4** in  $\text{CDCl}_3$ .

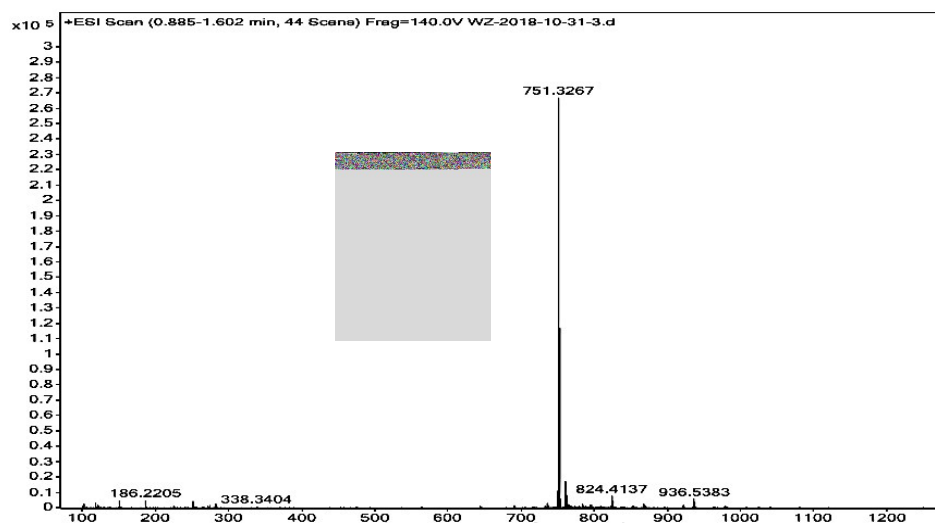

**Figure S6.** HRMS (ESI) of **4**: calcd for  $\text{C}_{43}\text{H}_{46}\text{N}_2\text{O}_{10}[\text{M} + \text{H}^+] = 751.3225$ , found 751.3268.

### **Stoichiometry and association constant determination for the complexation of **3** and with guest **G1** or **G5**.**

To determine the stoichiometry and association constant between Oxime-P5 and Guest,  $^1\text{H}$  NMR titration was carried out with solutions which had a constant concentration of **3** (5.0 mM) and varying concentrations of **G1** or **G5**. By a non-linear

curve-fitting method, the association constant between the guest and host **3** was calculated. The non-linear curve-fitting was based on the equation<sup>[2]</sup>:

$$\Delta\delta = (\Delta\delta_{\infty}/[\mathbf{3}]_0) (0.5[\text{guest}]_0 + 0.5([\mathbf{3}]_0 + 1/K_a) - (0.5([\text{guest}]_0^2 + (2[\text{guest}]_0(1/K_a - [\mathbf{3}]_0)) + (1/K_a + [\mathbf{3}]_0)^2)^{0.5}))$$

Where  $\Delta\delta$  is the chemical shift change of H<sub>OX5</sub> on Oxime-P5 at [Guest]<sub>0</sub>,  $\Delta\delta_{\infty}$  is the chemical shift change of H<sub>OX5</sub> when **3** is completely complexed, [**3**]<sub>0</sub> is the fixed initial concentration of **3**, and [Guest]<sub>0</sub> is the varying concentrations of guest (Figure S14, Figure S17).

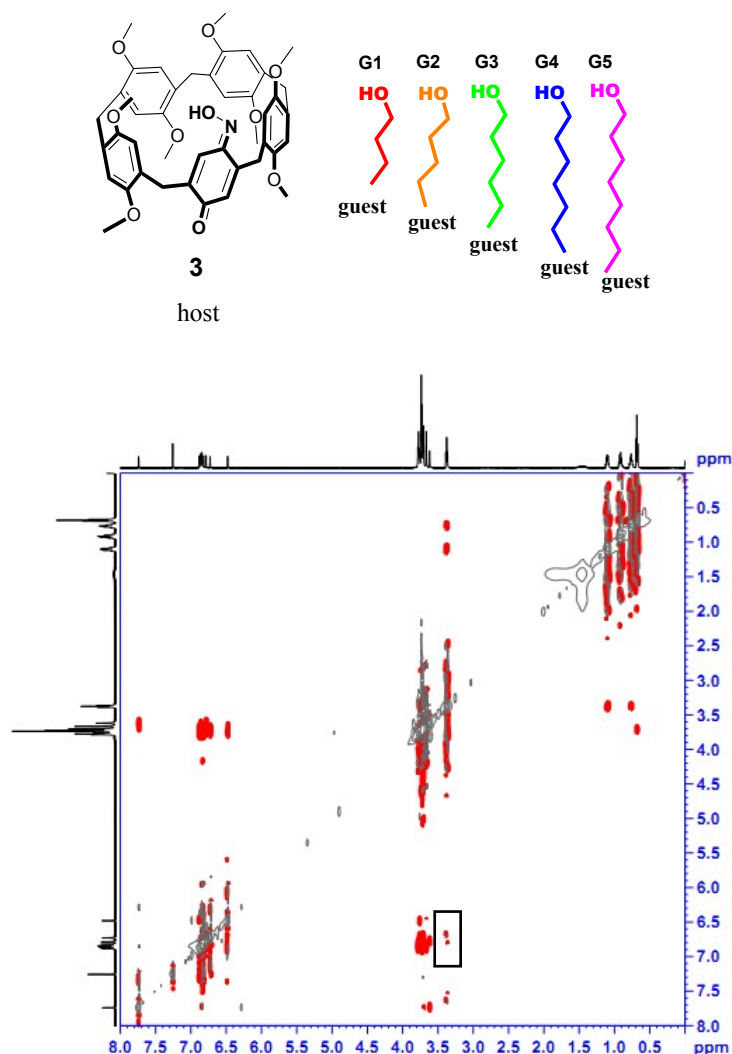

**Figure S7(a).** 2D NOESY spectrum of the mixture of **3** and **G1** in CDCl<sub>3</sub> (600 MHz) (The concentrations of **3** and **G1** are 41.9 mM and 83.7 mM, respectively)



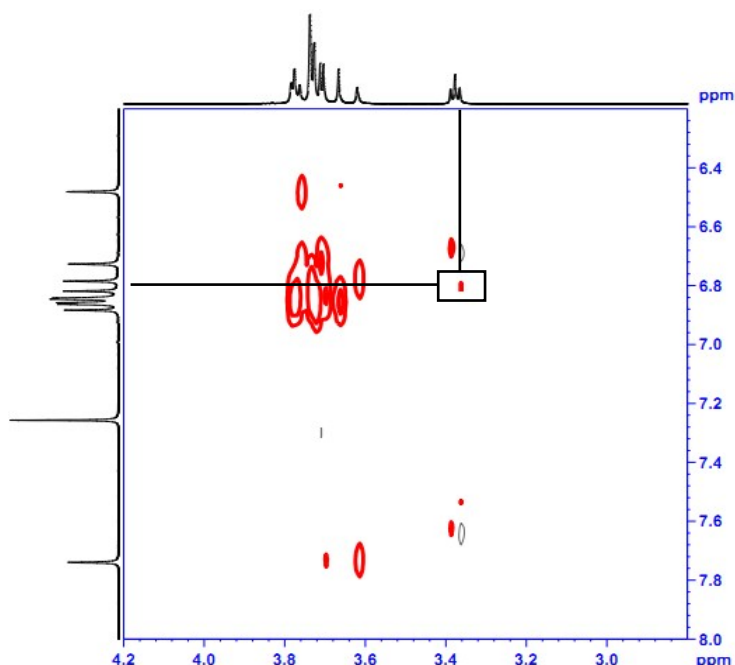

**Figure S7(b).** Partial 2D NOESY spectrum of the mixture of **3** and **G1** in  $\text{CDCl}_3$  (600 MHz, 298 K, The concentrations of **3** and **G1** are 41.9 mM and 83.7 mM, respectively)

**Crystallographic Data of  $\text{G1} \subset \text{3}$ :**  $[\text{C}_{47}\text{H}_{53}\text{NO}_{11}]$ ;  $M_r = 808.91$ ;  $T = 293(2)\text{K}$ ; monoclinic; space group  $\text{P2}_1/\text{c}$ ;  $a = 12.1968(2)$ ;  $b = 31.9446(4)$ ;  $c = 12.4129(2)\text{\AA}$ ;  $\alpha = 90^\circ$ ;  $\beta = 119.137(2)^\circ$ ;  $\gamma = 90^\circ$ ;  $V = 4224.34(13)\text{\AA}^3$ ;  $Z = 4$ ;  $\rho_{\text{calcd}} = 1.272\text{g/cm}^3$ ;  $\mu = 0.736\text{ mm}^{-1}$ ; reflections collected 110184; independent reflections 8564; data/restraints/parameters 8564/0/542;  $GOF$  on  $F^2$  1.106;  $R_{\text{int}}$  for independent data 0.0586; final  $R_1 = 0.0633$ ,  $wR_2 = 0.1400$ ;  $R$  indices (all data)  $R_1 = 0.0714$   $wR_2 = 0.1441$ ; largest diff. peak and hole: 0.62 and  $-0.40\text{ e\AA}^{-3}$ .

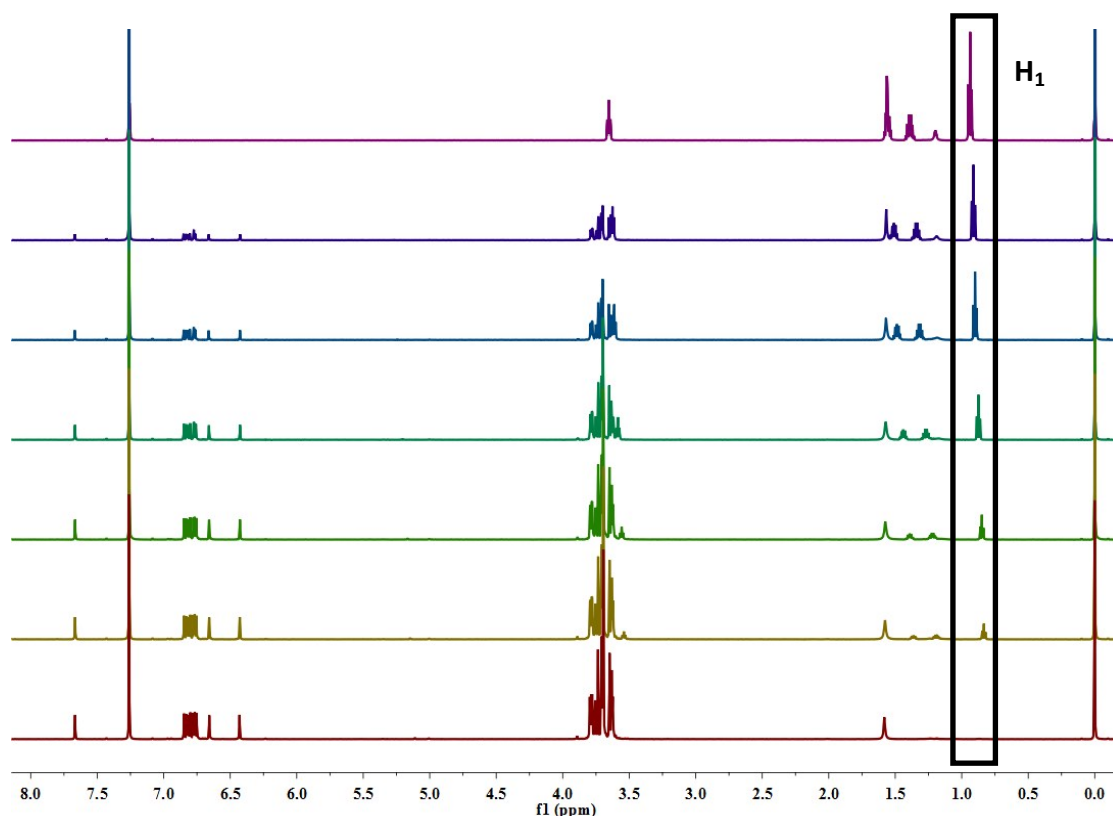

**Figure S8.** Job  $^1\text{H}$  NMR spectra (500 MHz,  $\text{CDCl}_3$ , 298 K) of **3** and **G1**. From bottom to top, the concentrations of **3** were 10, 8, 7, 5, 3, 2, and 0 mM, and the concentrations of **G1** were 0, 2, 3, 5, 7, 8, and 10 mM.

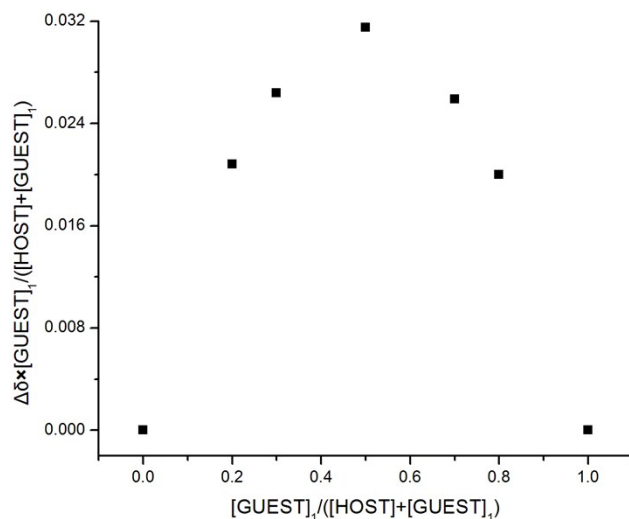

**Figure S9.** Job plot of **3** and **G1**. Job plot shows that the 1:1 stoichiometry of the complex between **3** and **G1** in  $\text{CDCl}_3$  by plotting the  $\Delta\delta$  of chemical shift of **G1**'s  $\text{H}_1$  (see Figure S8) in  $^1\text{H}$  NMR spectroscopy against the mole fraction of complex. ( $[\text{HOST}] + [\text{GUEST}]_1 = 10.0 \text{ mM}$ )

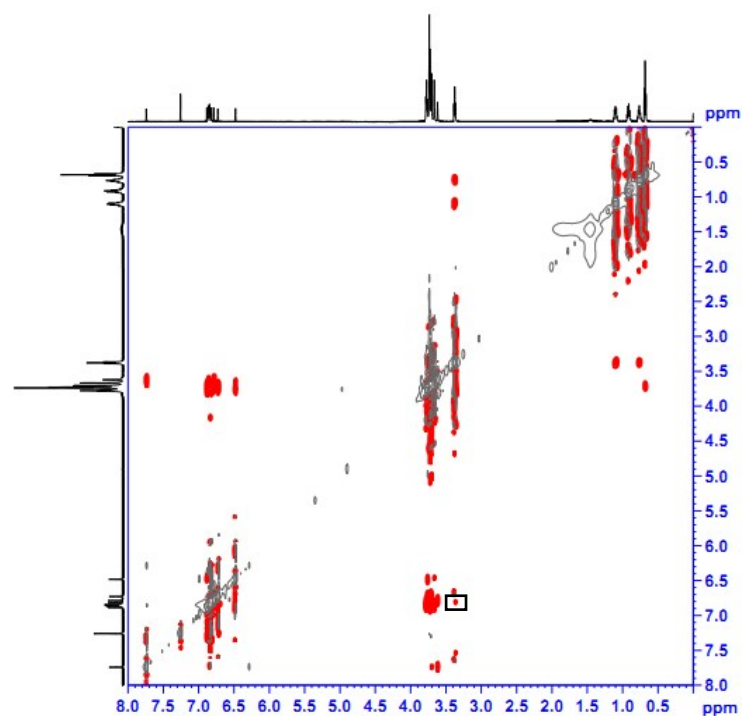

**Figure S10(a).** 2D NOESY spectrum of the mixture of **3** and **G2** in  $\text{CDCl}_3$  (600 MHz)  
(The concentrations of **3** and **G2** are 41.9 mM and 83.7 mM, respectively)

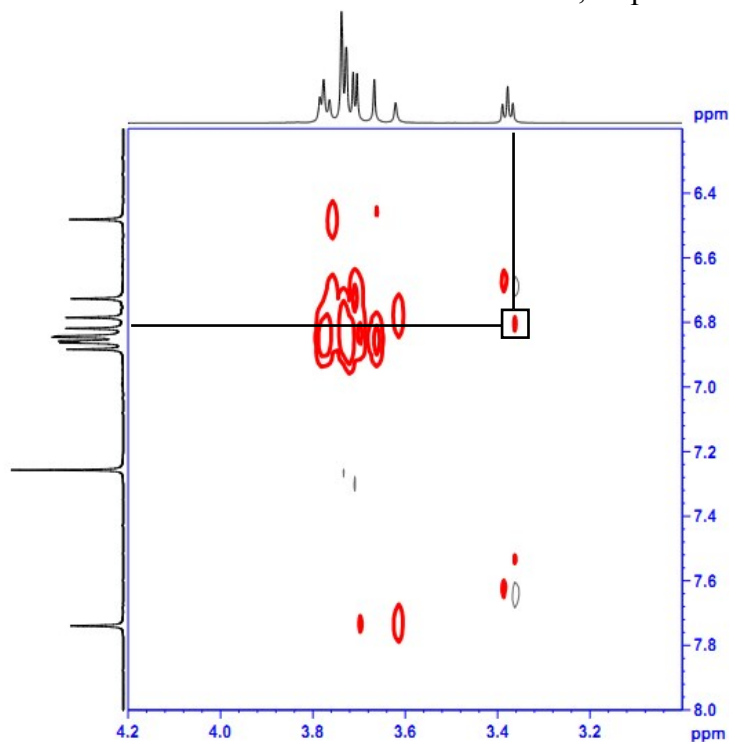

**Figure S10(b).** Partial 2D NOESY spectrum of the mixture of **3** and **G2** in  $\text{CDCl}_3$   
(600 MHz, 298 K, The concentrations of **3** and **G2** are 41.9 mM and 83.7 mM, respectively)

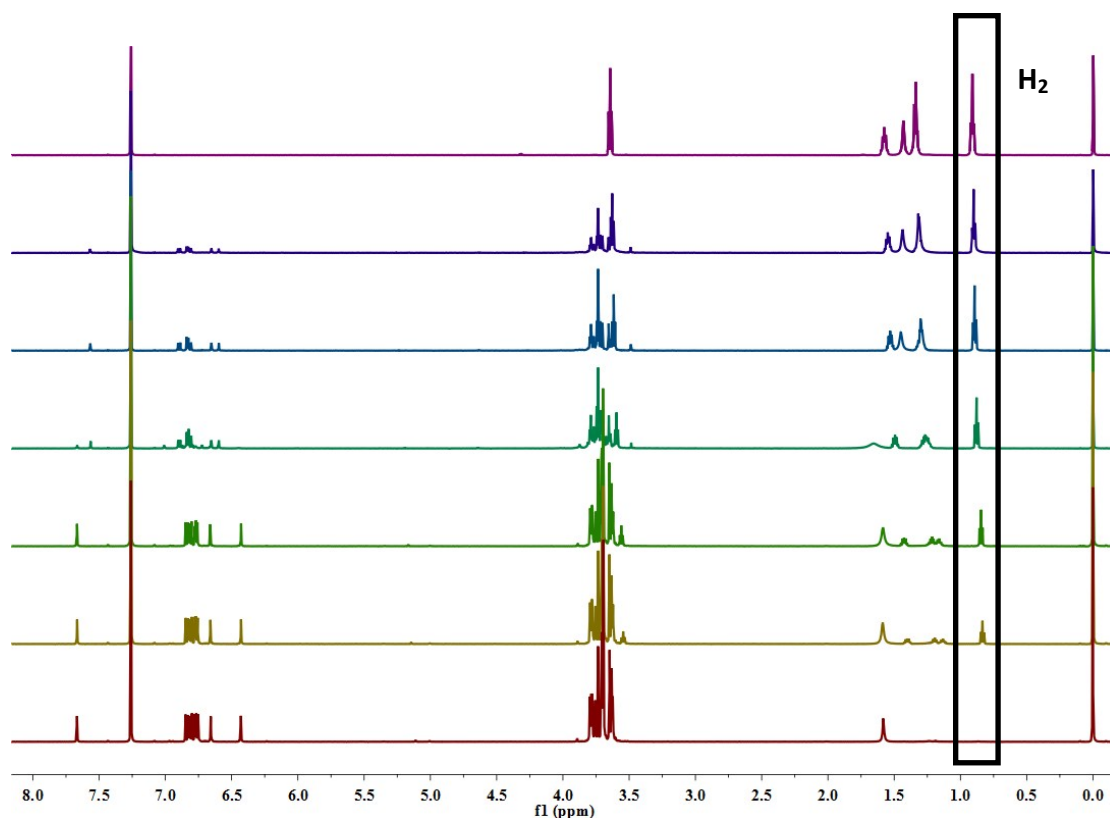

**Figure S11.** Job  $^1\text{H}$  NMR spectra (500 MHz,  $\text{CDCl}_3$ , 298 K) of **3** and **G2**. From bottom to top, the concentrations of **3** were 10, 8, 7, 5, 3, 2, and 0 mM, and the concentrations of **G2** were 0, 2, 3, 5, 7, 8, and 10 mM.

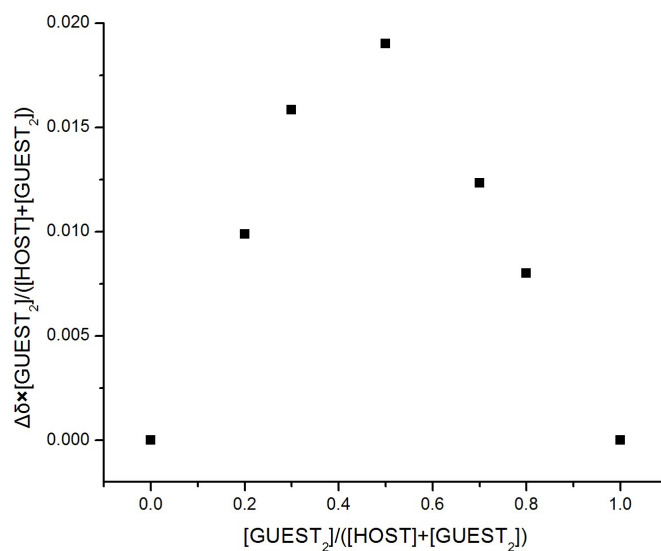

**Figure S12.** Job plot of **3** and **G2**. Job plot shows that the 1:1 stoichiometry of the complex between **3** and **G2** in  $\text{CDCl}_3$  by plotting the  $\Delta\delta$  of chemical shift of **G2**'s  $\text{H}_2$  (see Figure S8) in  $^1\text{H}$  NMR spectroscopy against the mole fraction of complex.  $([\text{HOST}] + [\text{GUEST}]_2 = 10.0 \text{ mM})$

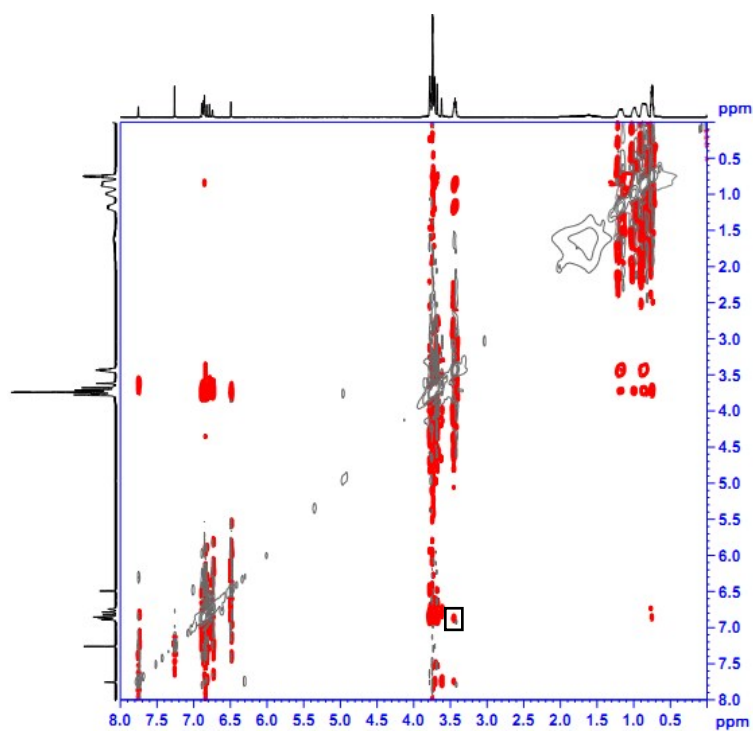

**Figure S13(a).** 2D NOESY spectrum of the mixture of **3** and **G3** in  $\text{CDCl}_3$  (600 MHz)  
(The concentrations of **3** and **G3** are 41.9 mM and 83.7 mM, respectively)

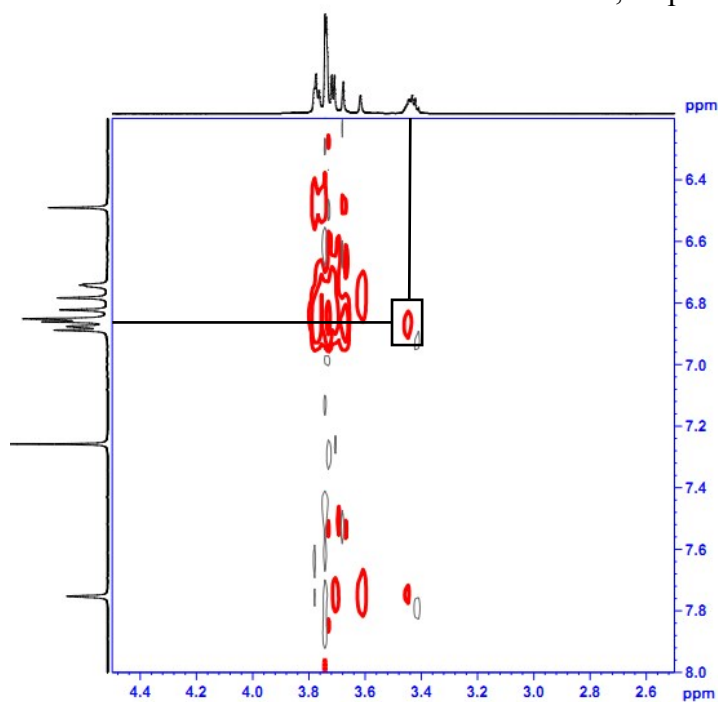

**Figure S13(b).** Partial 2D NOESY spectrum of the mixture of **3** and **G3** in  $\text{CDCl}_3$   
(600 MHz, 298 K, The concentrations of **3** and **G3** are 41.9 mM and 83.7 mM, respectively)

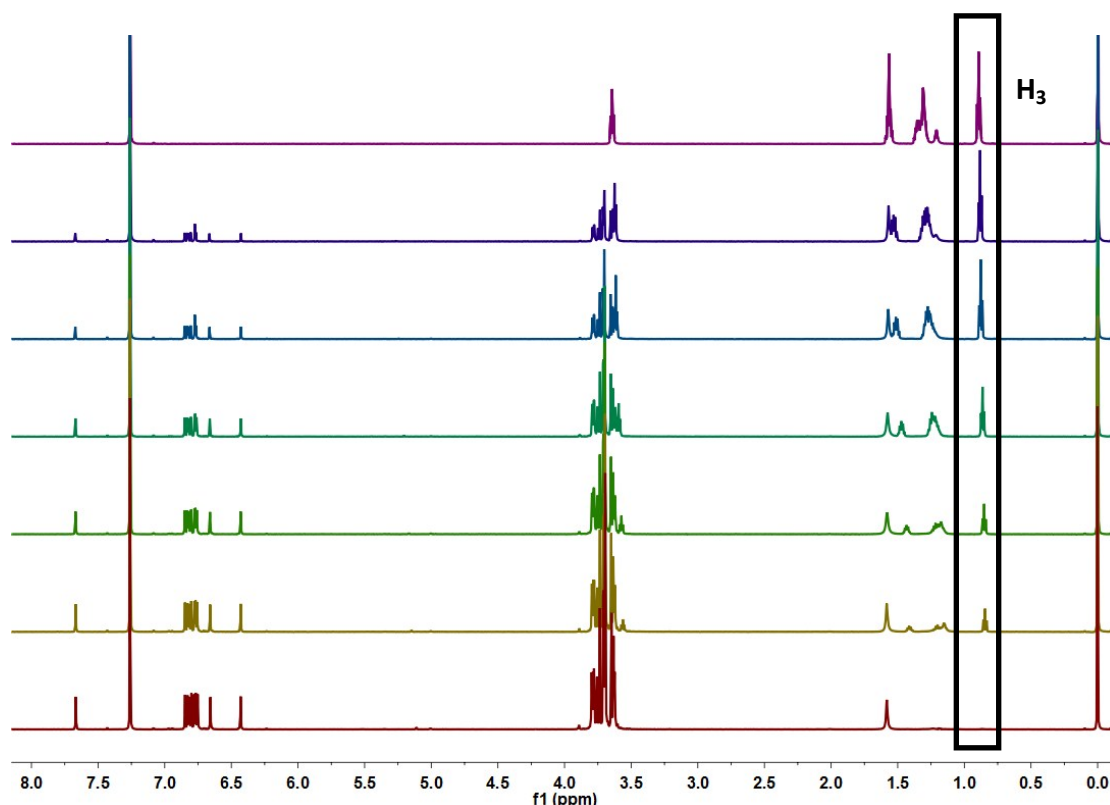

**Figure S14.** Job  $^1\text{H}$  NMR spectra (500 MHz,  $\text{CDCl}_3$ , 298 K) of **3** and **G3**. From bottom to top, the concentrations of **3** were 10, 8, 7, 5, 3, 2, and 0 mM, and the concentrations of **G3** were 0, 2, 3, 5, 7, 8, and 10 mM.

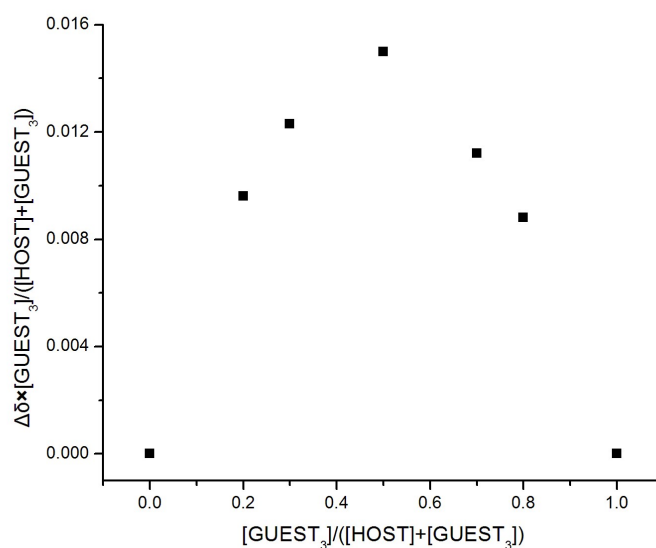

**Figure S15.** Job plot of **3** and **G3**. Job plot shows that the 1:1 stoichiometry of the complex between **3** and **G3** in  $\text{CDCl}_3$  by plotting the  $\Delta\delta$  of chemical shift of **G3**'s  $\text{H}_3$  (see Figure S8) in  $^1\text{H}$  NMR spectroscopy against the mole fraction of complex.  $([\text{HOST}] + [\text{GUEST}]_3 = 10.0 \text{ mM})$

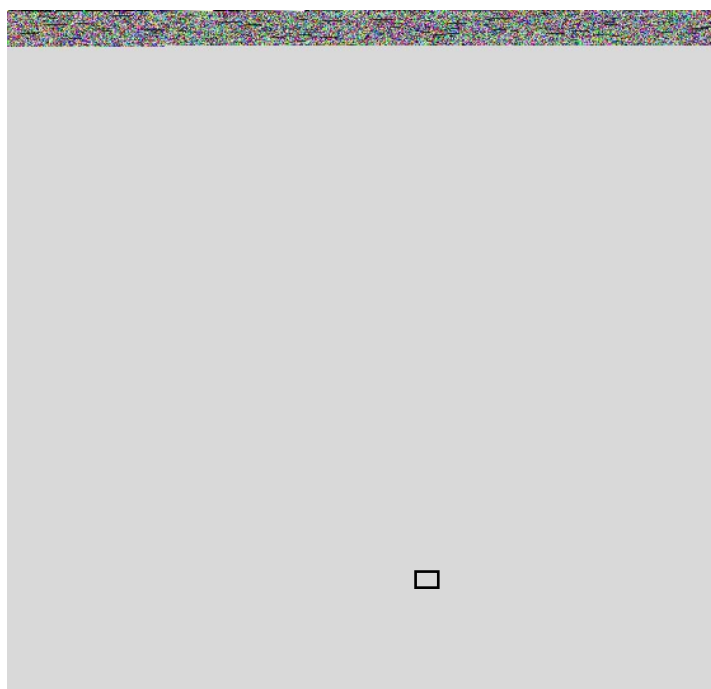

**Figure S16(a).** 2D NOESY spectrum of the mixture of **3** and **G4** in  $\text{CDCl}_3$  (600 MHz)  
(The concentrations of **3** and **G4** are 41.9 mM and 83.7 mM, respectively)

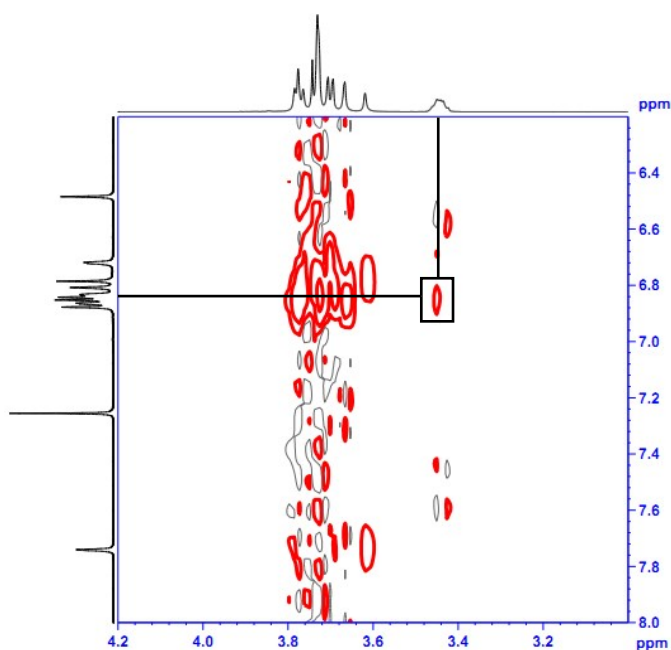

**Figure S16(b).** Partial 2D NOESY spectrum of the mixture of **3** and **G4** in  $\text{CDCl}_3$   
(600 MHz, 298 K, The concentrations of **3** and **G4** are 41.9 mM and 83.7 mM, respectively)

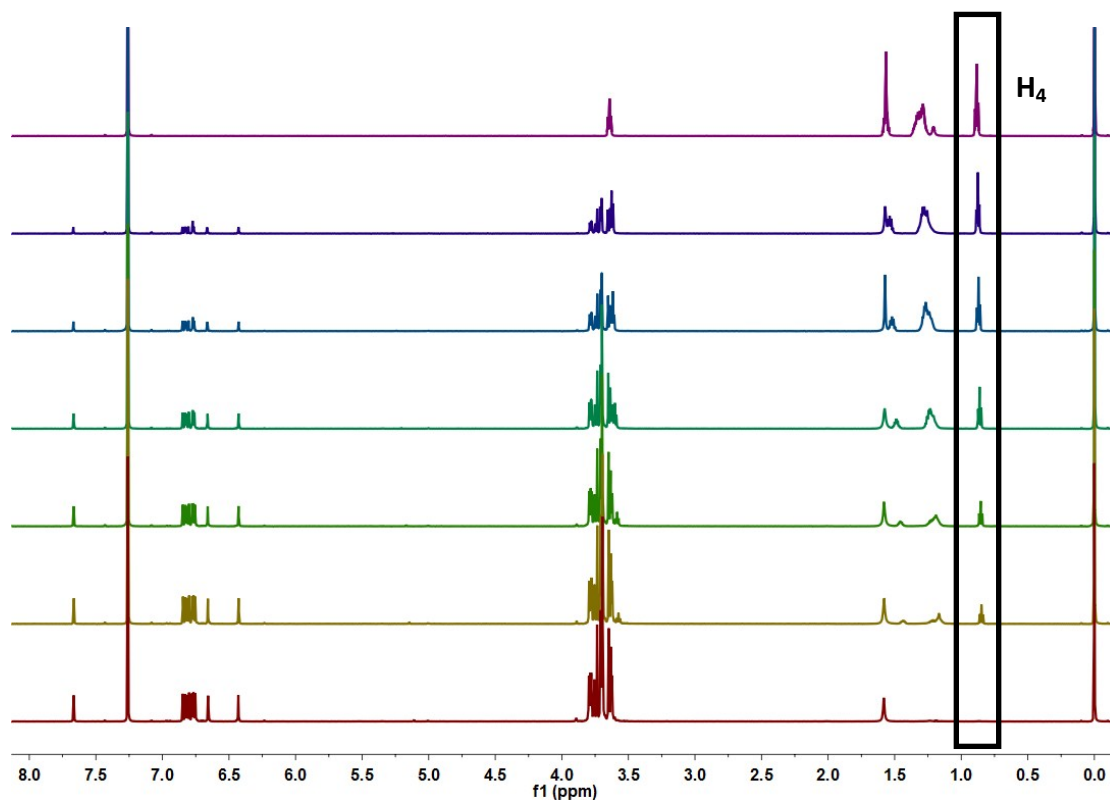

**Figure S17.** Job  $^1\text{H}$  NMR spectra (500 MHz,  $\text{CDCl}_3$ , 298 K) of **3** and **G4**. From bottom to top, the concentrations of **3** were 10, 8, 7, 5, 3, 2, and 0 mM, and the concentrations of **G4** were 0, 2, 3, 5, 7, 8, and 10 mM.

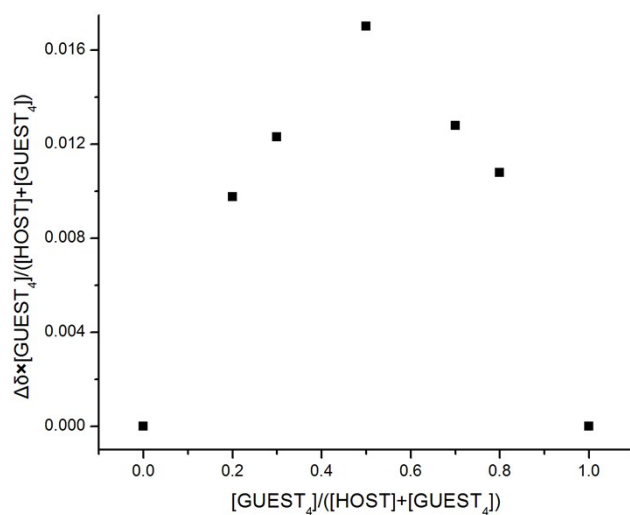

**Figure S18.** Job plot of **3** and **G4**. Job plot shows that the 1:1 stoichiometry of the complex between **3** and **G4** in  $\text{CDCl}_3$  by plotting the  $\Delta\delta$  of chemical shift of **G4**'s  $\text{H}_3$  (see Figure S8) in  $^1\text{H}$  NMR spectroscopy against the mole fraction of complex. ( $[\text{HOST}] + [\text{GUEST}]_3 = 10.0 \text{ mM}$ )



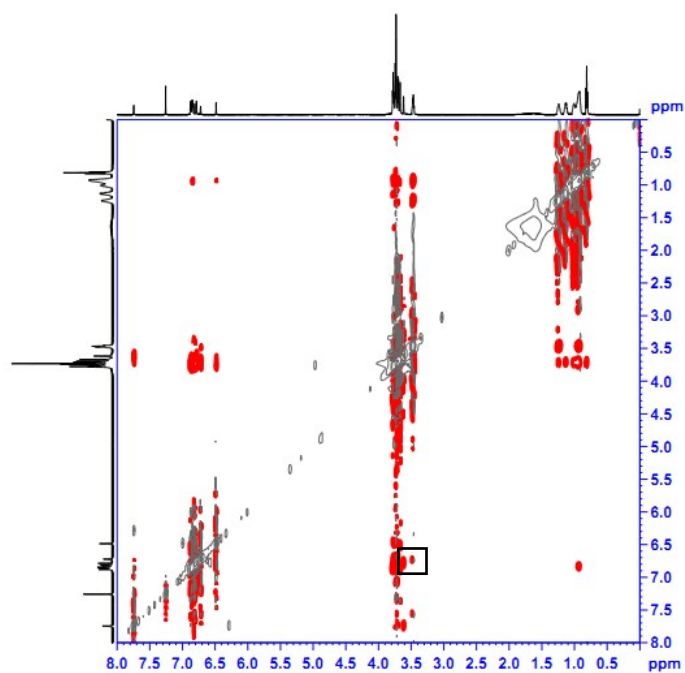

**Figure S19 (a).** 2D NOESY spectrum of the mixture of **3** and **G5** in  $\text{CDCl}_3$  (600 MHz, 298 K, The concentrations of **3** and **G5** are 41.9 mM and 83.7 mM, respectively)

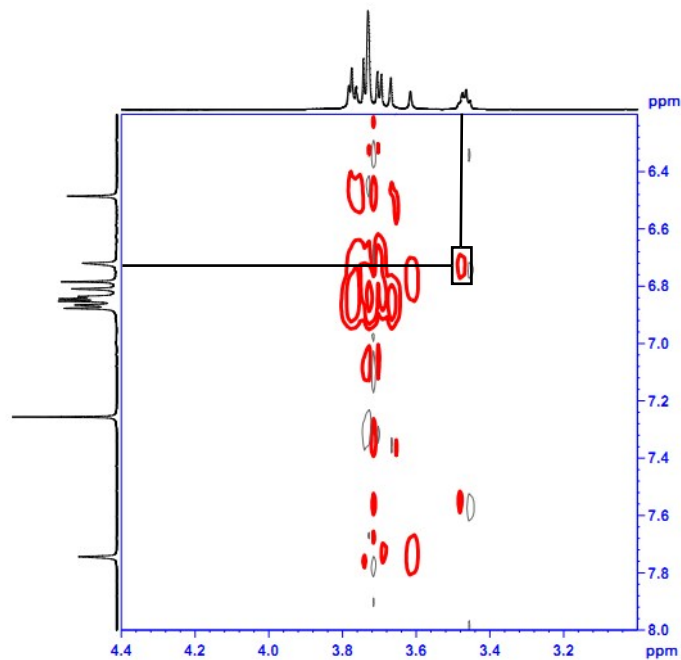

**Figure S19 (b).** Partial 2D NOESY spectrum of the mixture of **3** and **G5** in  $\text{CDCl}_3$  (600 MHz, 298 K, The concentrations of **3** and **G5** are 41.9 mM and 83.7 mM, respectively)

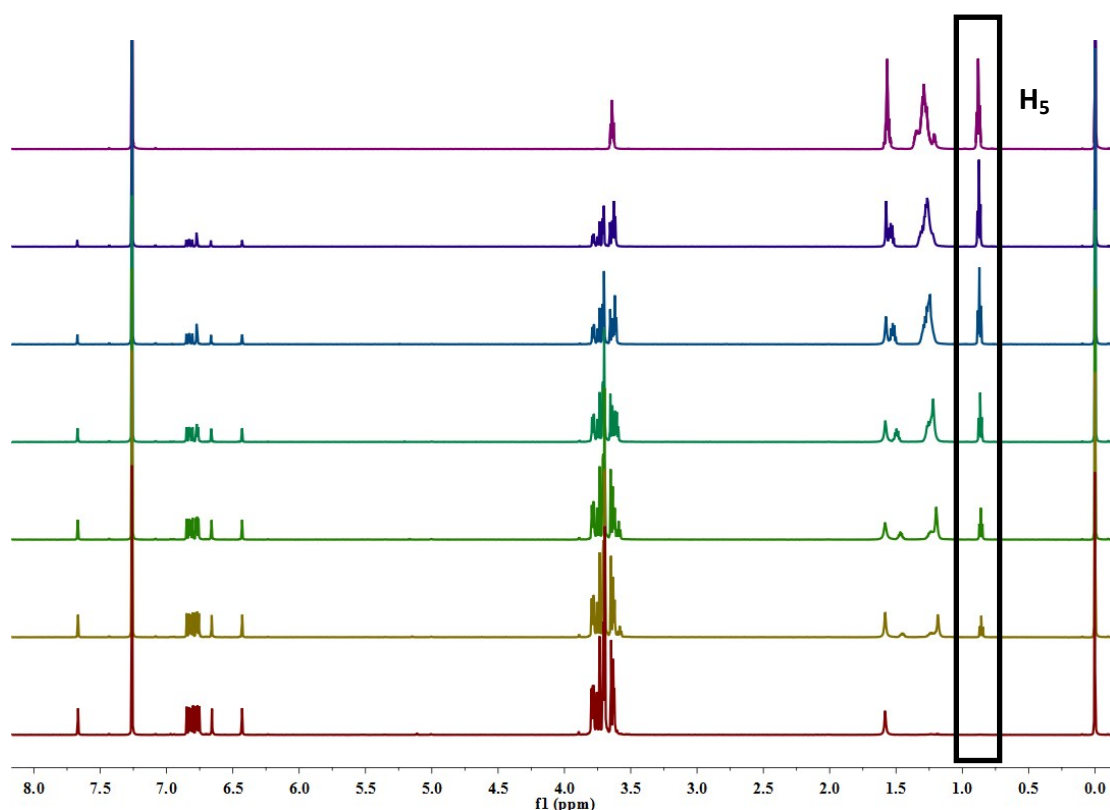

**Figure S20.** Job  $^1\text{H}$  NMR spectra (500 MHz,  $\text{CDCl}_3$ , 298 K) of **3** and **G5**. From bottom to top, the concentrations of **3** were 10, 8, 7, 5, 3, 2, and 0 mM, and the concentrations of **G5** were 0, 2, 3, 5, 7, 8, and 10 mM.

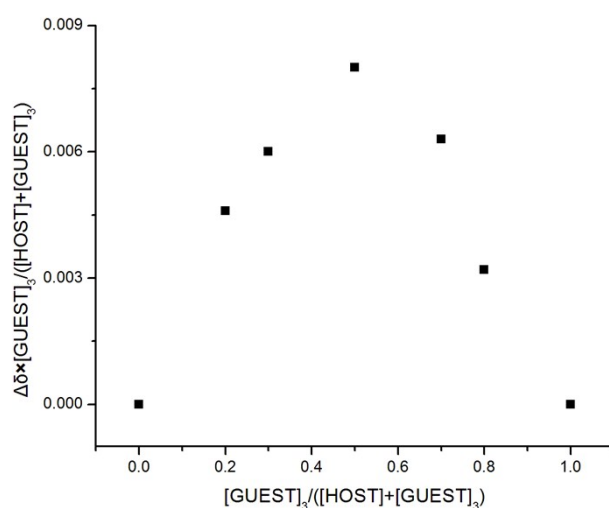

**Figure S21.** Job plot of **3** and **G5**. Job plot showing the 1:1 stoichiometry of the complex between **3** and **G5** in  $\text{CDCl}_3$  by plotting the  $\Delta\delta$  of chemical shift of **G5**'s H (see Figure S11) in  $^1\text{H}$  NMR spectroscopy against the mole fraction of complex. ( $[\text{HOST}] + [\text{GUEST}]_3 = 10.0 \text{ mM}$ )

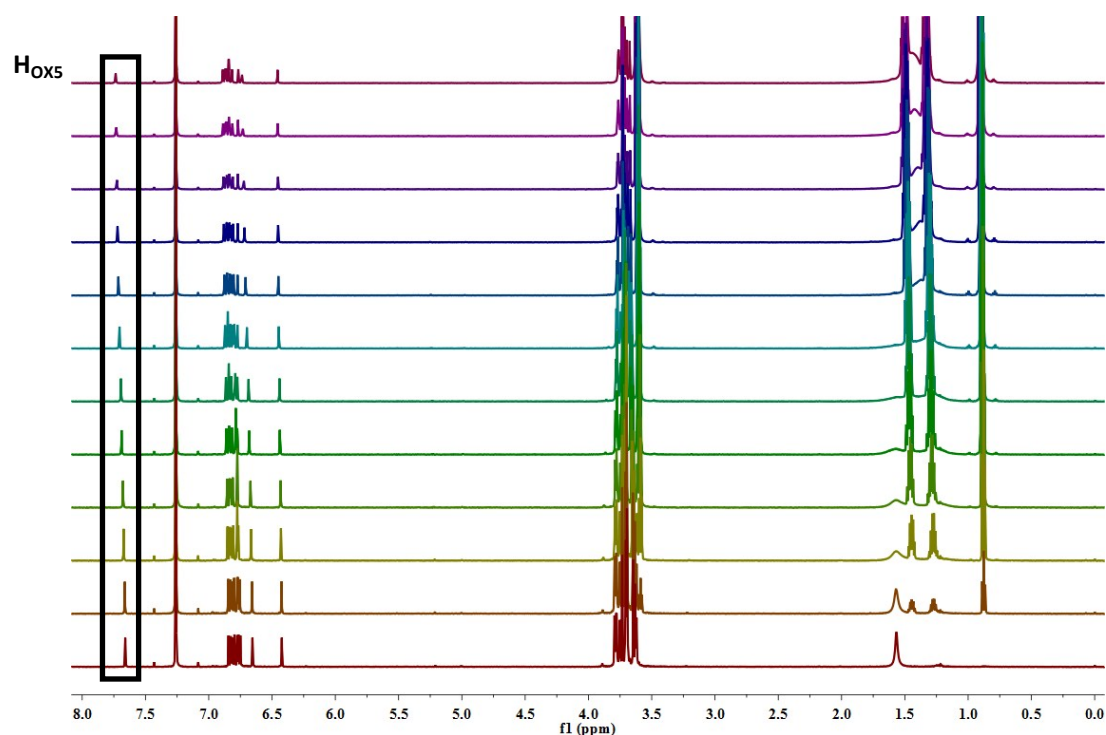

**Figure S22.**  $^1\text{H}$  NMR spectra of **3** upon addition of **G1**.  $^1\text{H}$  NMR spectra (500 MHz,  $\text{CDCl}_3$ , 298 K) of **3** at a concentration of 4.0 mM upon addition of **G1**. From bottom to top, the concentrations of **G1** were 0, 4, 12, 20, 32, 40, 60, 80, 100, 120, 140, and 160 mM.

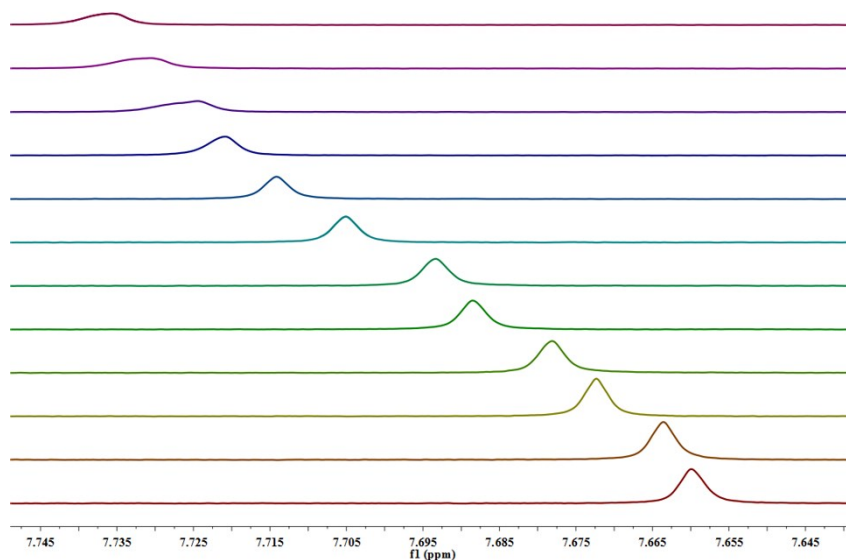

**Figure S23.**  $^1\text{H}$  NMR spectra of  $\text{H}_{\text{OX5}}$  peak shift of **3** upon addition of **G1**.  $^1\text{H}$  NMR spectra (500 MHz,  $\text{CDCl}_3$ , 298 K) of  $\text{H}_{\text{OX5}}$  peak shift of **3** at a concentration of 4.0 mM upon addition of **G1**. From bottom to top, the concentrations of **G1** were 0, 4, 12, 20, 32, 40, 60, 80, 100, 120, 140, and 160 mM.

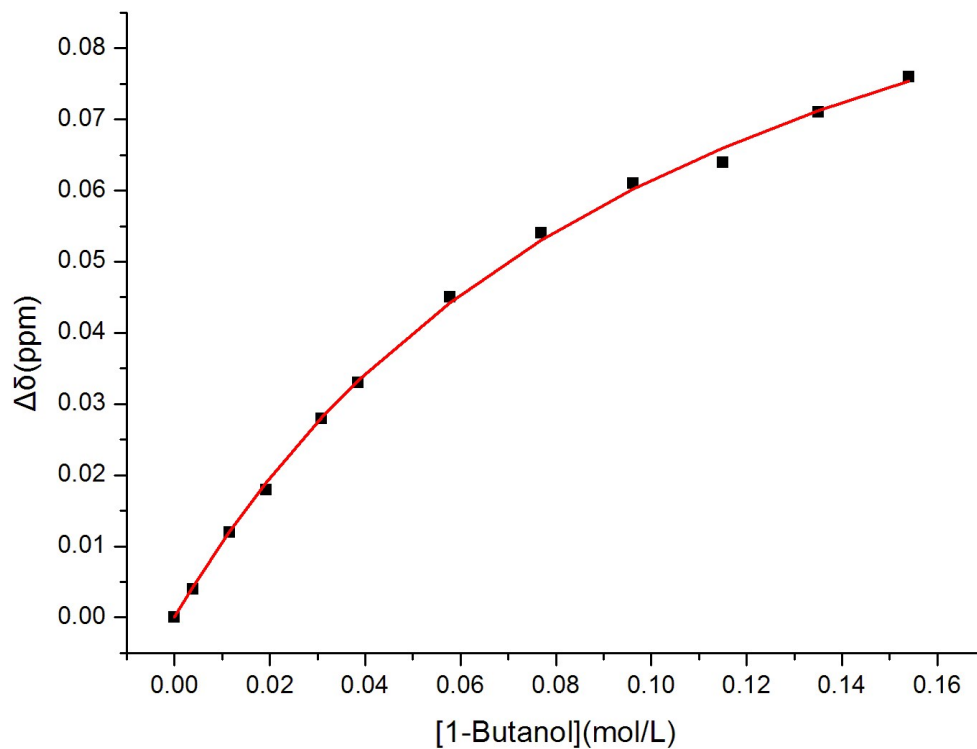

**Figure S24.** The non-linear curve-fitting for the complexation of **3** with **G1**. The non-linear curve-fitting (NMR titrations,  $\Delta\delta$  of  $H_{OBX}$ ) for the complexation of **3** (5.0 mM) with **G1** in  $CDCl_3$  at 298 K. The concentrations of **G1** were 0, 4, 12, 20, 32, 40, 60, 80, 100, 120, 140, and 160 mM. The  $K_a$  value for **G1**  $\subset$  **3** complex in  $CDCl_3$  at 298 K is determined to be  $9.25 \pm 0.47 \text{ M}^{-1}$  (Adj. R-Square: 0.9990).

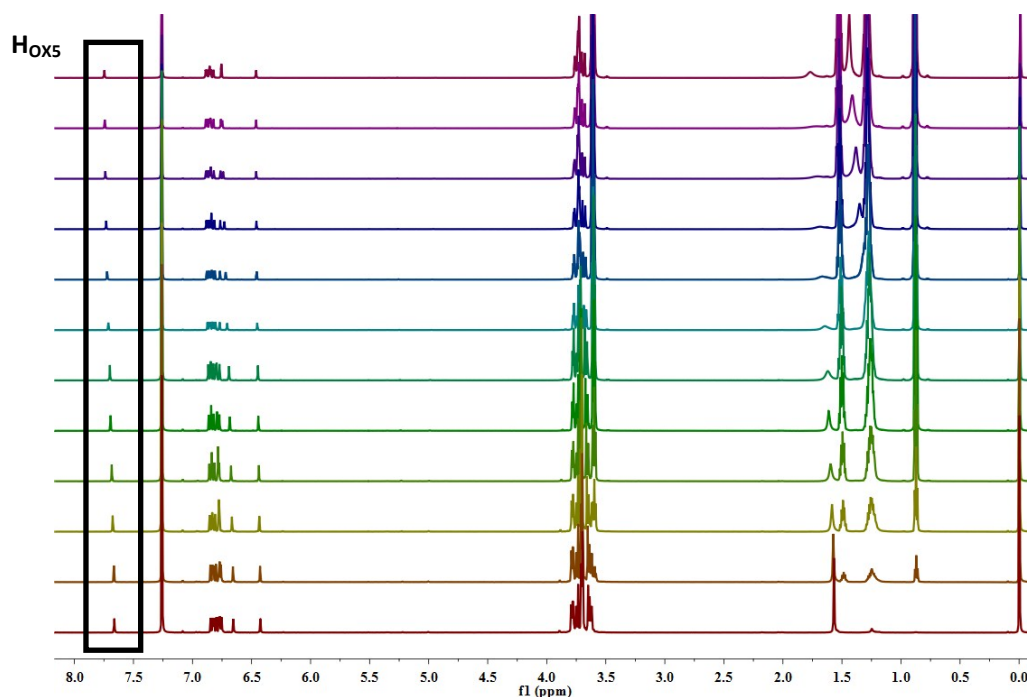

**Figure S25.**  $^1\text{H}$  NMR spectra of **3** upon addition of **G2**.  $^1\text{H}$  NMR spectra (500 MHz,  $\text{CDCl}_3$ , 298 K) of **3** at a concentration of 4.0 mM upon addition of **G2**. From bottom to top, the concentrations of **G2** were 0, 4, 12, 20, 32, 40, 60, 80, 100, 120, 140, and 160 mM.

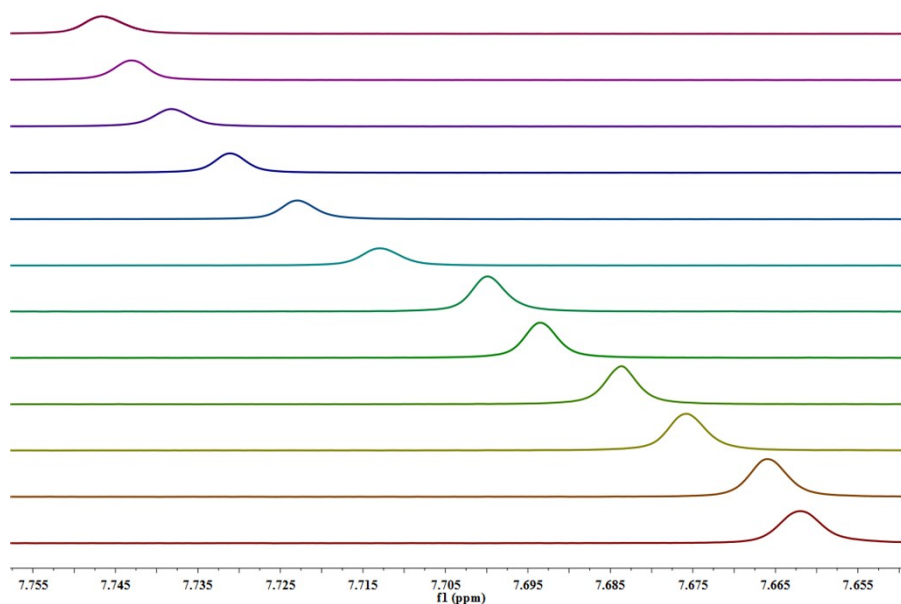

**Figure S26.**  $^1\text{H}$  NMR spectra of  $\text{H}_{\text{OX5}}$  peak shift of **3** upon addition of **G2**.  $^1\text{H}$  NMR spectra (500 MHz,  $\text{CDCl}_3$ , 298 K) of  $\text{H}_{\text{OX5}}$  peak shift of **3** at a concentration of 4.0 mM upon addition of **G2**. From bottom to top, the concentrations of **G2** were 0, 4, 12, 20, 32, 40, 60, 80, 100, 120, 140, and 160 mM.

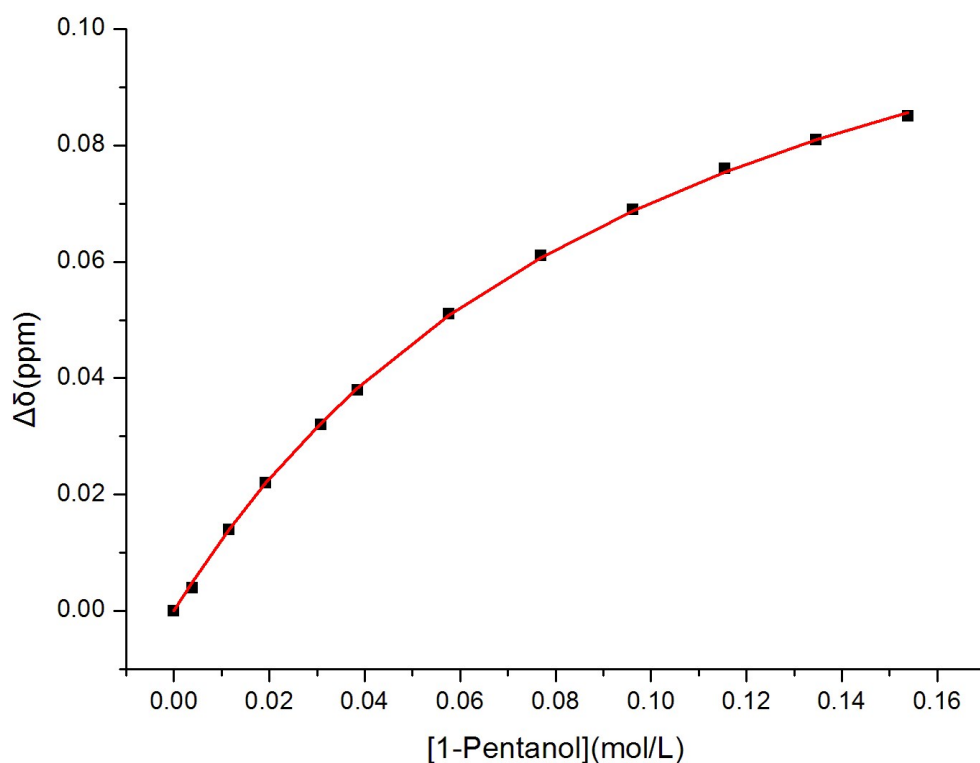

**Figure S27.** The non-linear curve-fitting for the complexation of **3** with **G2**. The non-linear curve-fitting (NMR titrations,  $\Delta\delta$  of  $H_{OBX}$ ) for the complexation of **3** (5.0 mM) with **G2** in  $CDCl_3$  at 298 K. The concentrations of **G2** were 0, 4, 12, 20, 32, 40, 60, 80, 100, 120, 140, and 160 mM. The  $K_a$  value for **G2**  $\subset$  **3** complex in  $CDCl_3$  at 298 K is determined to be  $9.63 \pm 0.23 \text{ M}^{-1}$  (Adj. R-Square: 0.9998).

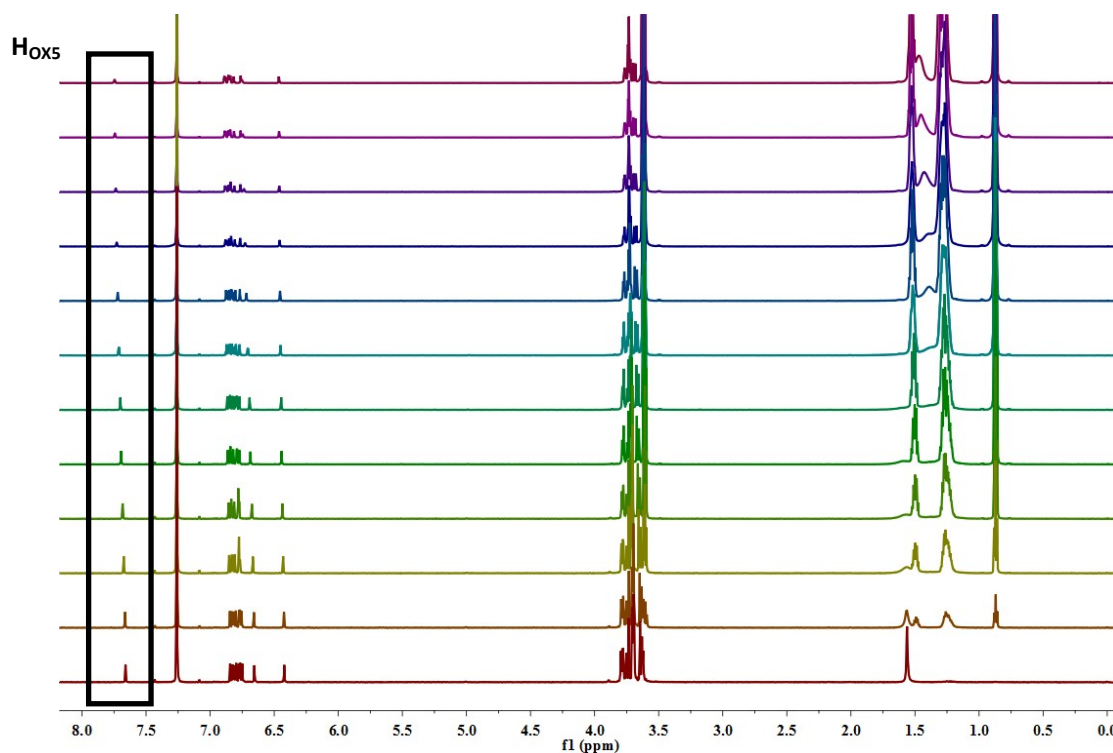

**Figure S28.**  $^1\text{H}$  NMR spectra of **3** upon addition of **G3**.  $^1\text{H}$  NMR spectra (500 MHz,  $\text{CDCl}_3$ , 298 K) of **3** at a concentration of 4.0 mM upon addition of **G3**. From bottom to top, the concentrations of **G3** were 0, 4, 12, 20, 32, 40, 60, 80, 100, 120, 140, and 160 mM.

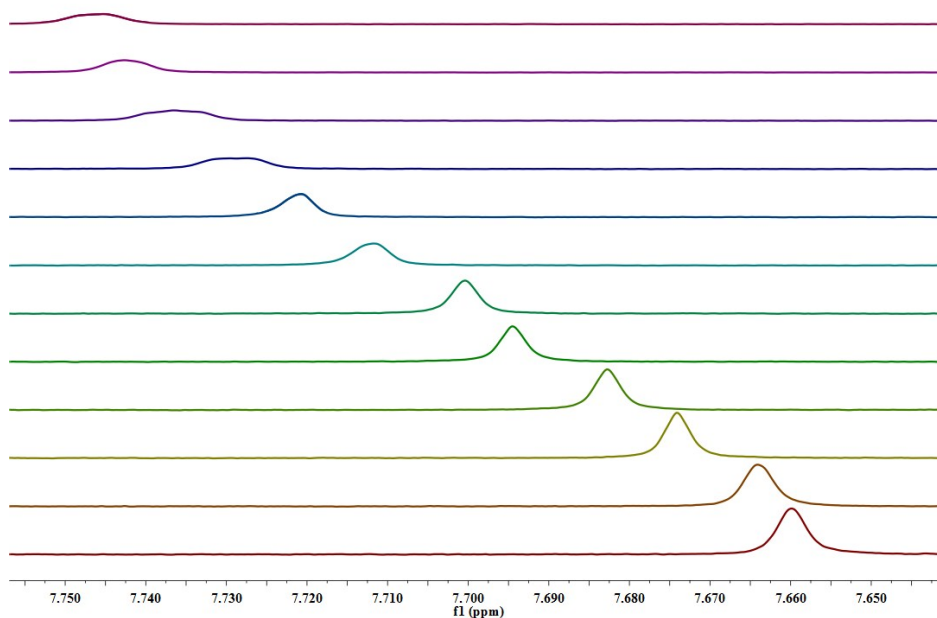

**Figure S29.**  $^1\text{H}$  NMR spectra of  $\text{H}_{\text{OX5}}$  peak shift of **3** upon addition of **G3**.  $^1\text{H}$  NMR spectra (500 MHz,  $\text{CDCl}_3$ , 298 K) of  $\text{H}_{\text{OX5}}$  peak shift of **3** at a concentration of 4.0 mM upon addition of **G3**. From bottom to top, the concentrations of **G3** were 0, 4, 12, 20, 32, 40, 60, 80, 100, 120, 140, and 160 mM.

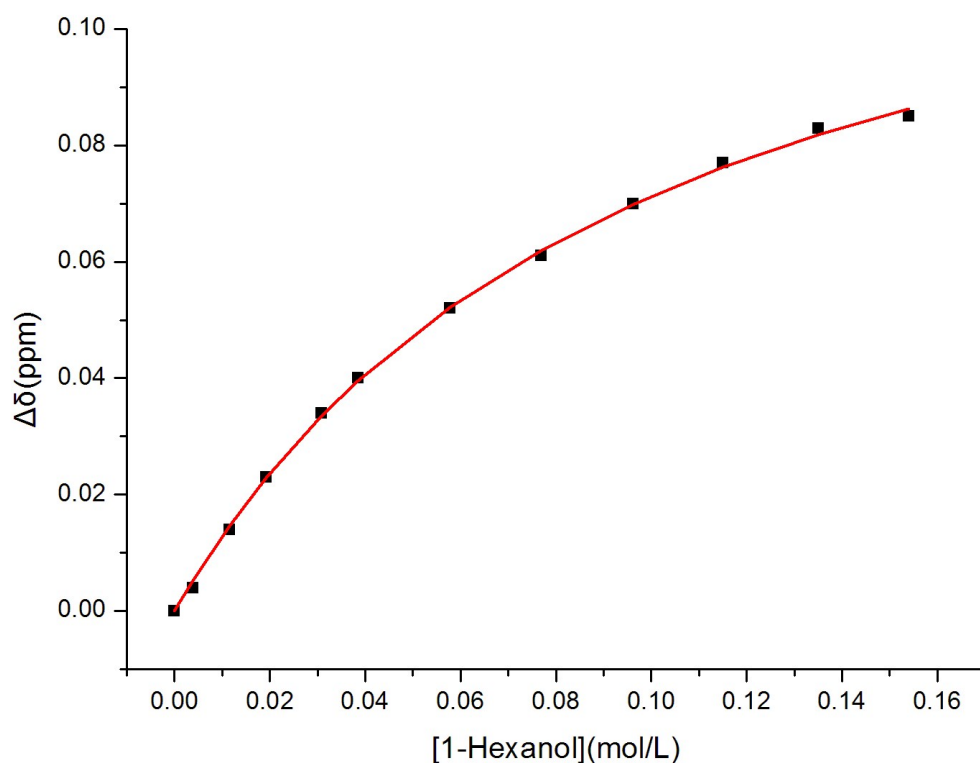

**Figure S30.** The non-linear curve-fitting for the complexation of **3** with **G3**. The non-linear curve-fitting (NMR titrations,  $\Delta\delta$  of  $H_{OBX}$ ) for the complexation of **3** (5.0 mM) with **G3** in  $CDCl_3$  at 298 K. The concentrations of **G3** were 0, 4, 12, 20, 32, 40, 60, 80, 100, 120, 140, and 160 mM. The  $K_a$  value for **G3**  $\subset$  **3** complex in  $CDCl_3$  at 298 K is determined to be  $10.45 \pm 0.43 \text{ M}^{-1}$  (Adj. R-Square: 0.9993).



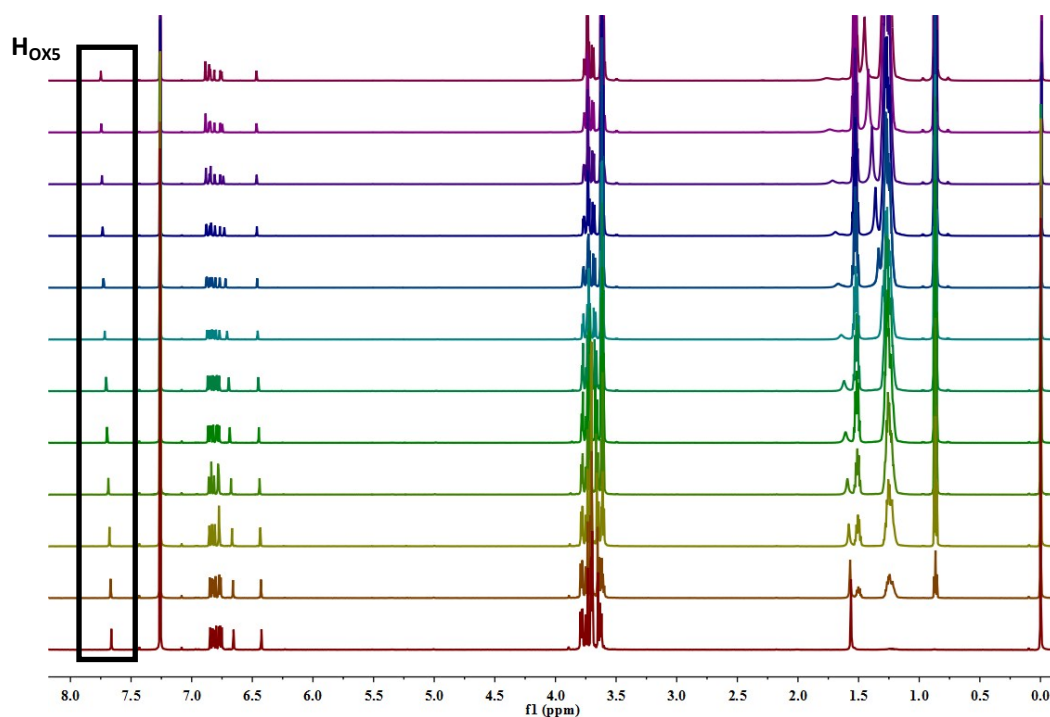

**Figure S31.**  $^1\text{H}$  NMR spectra of **3** upon addition of **G4**.  $^1\text{H}$  NMR spectra (500 MHz,  $\text{CDCl}_3$ , 298 K) of **3** at a concentration of 4.0 mM upon addition of **G4**. From bottom to top, the concentrations of **G4** were 0, 4, 12, 20, 32, 40, 60, 80, 100, 120, 140, and 160 mM.

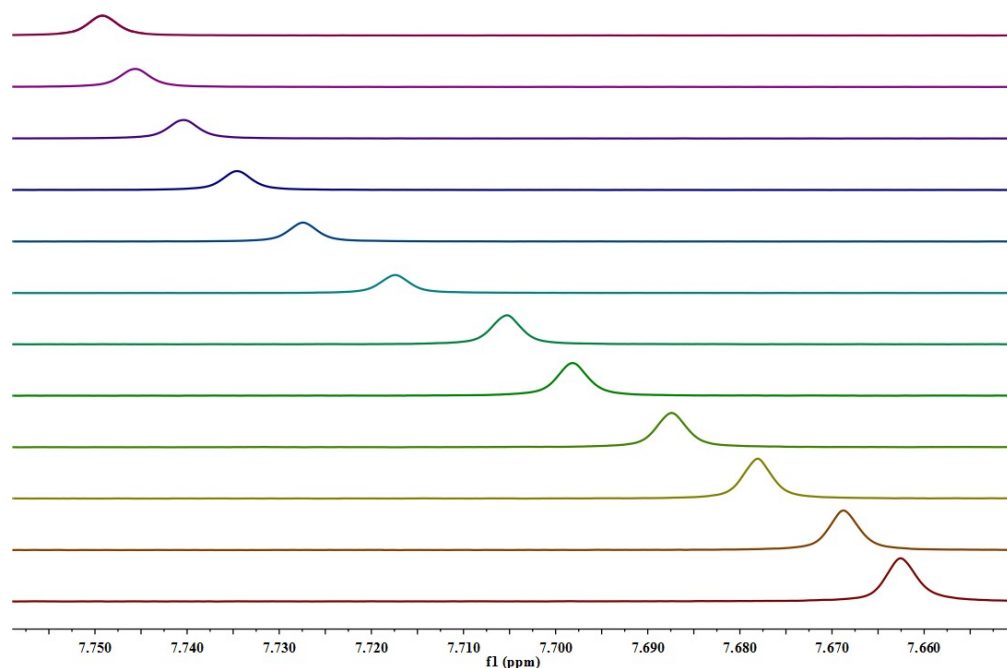

**Figure S32.**  $^1\text{H}$  NMR spectra of  $\text{H}_{\text{OX5}}$  peak shift of **3** upon addition of **G4**.  $^1\text{H}$  NMR spectra (500 MHz,  $\text{CDCl}_3$ , 298 K) of  $\text{H}_{\text{OX5}}$  peak shift of **3** at a concentration of 4.0 mM upon addition of **G4**. From bottom to top, the concentrations of **G4** were 0, 4, 12, 20, 32, 40, 60, 80, 100, 120, 140, and 160 mM.

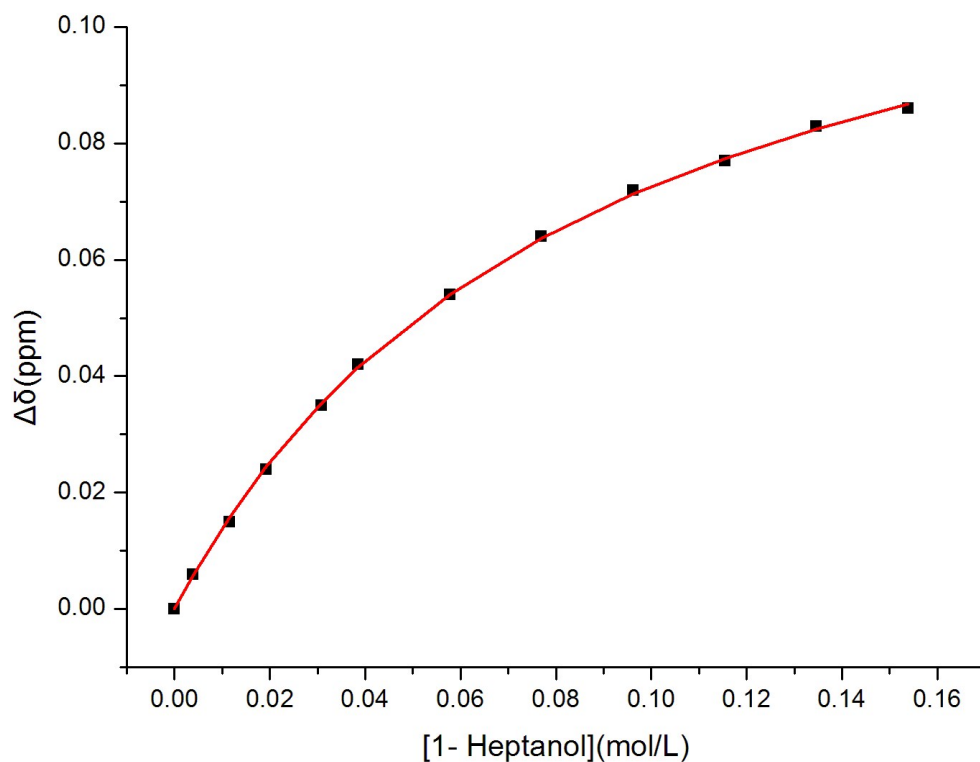

**Figure S33.** The non-linear curve-fitting for the complexation of **3** with **G4**. The non-linear curve-fitting (NMR titrations,  $\Delta\delta$  of  $H_{OBX}$ ) for the complexation of **3** (5.0 mM) with **G4** in  $CDCl_3$  at 298 K. The concentrations of **G4** were 0, 4, 12, 20, 32, 40, 60, 80, 100, 120, 140, and 160 mM. The  $K_a$  value for **G4**  $\subset$  **3** complex in  $CDCl_3$  at 298 K is determined to be  $11.94 \pm 0.29 \text{ M}^{-1}$  (Adj. R-Square: 0.9997).

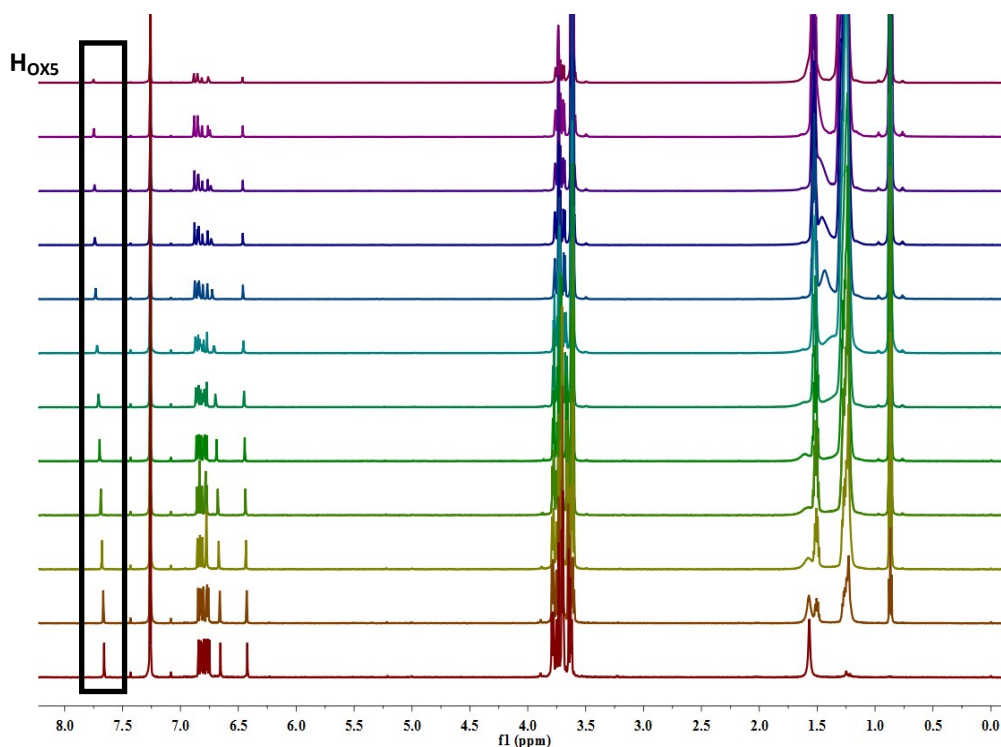

**Figure S34.**  $^1\text{H}$  NMR spectra of **3** at a concentration upon addition of **G5**.  $^1\text{H}$  NMR spectra (500 MHz,  $\text{CDCl}_3$ , 298 K) of **3** at a concentration of 4.0 mM upon addition of **G5**. From bottom to top, the concentrations of **G5** were 0, 4, 12, 20, 32, 40, 60, 80, 100, 120, 140, and 160 mM.

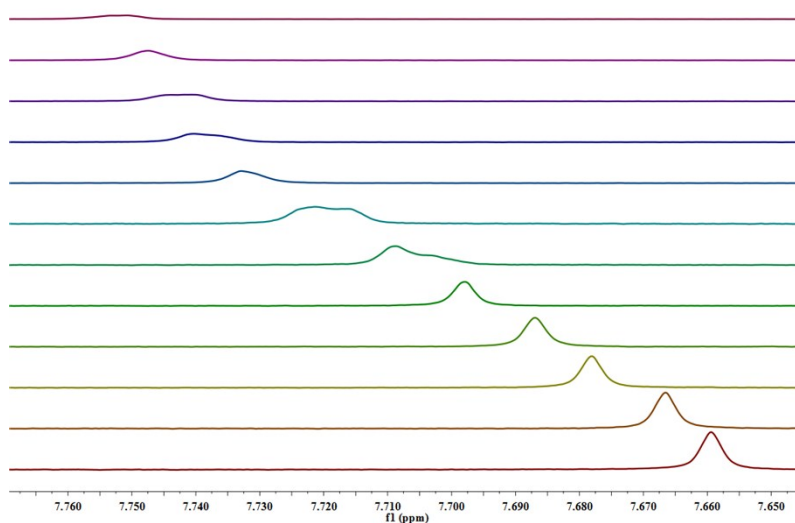

**Figure S35.**  $^1\text{H}$  NMR spectra (500 MHz,  $\text{CDCl}_3$ , 298 K) of  $\text{H}_{\text{OX5}}$  peak shift of **3** at a concentration of 4.0 mM upon addition of **G5**. From bottom to top, the concentrations of **G5** were 0, 4, 12, 20, 32, 40, 60, 80, 100, 120, 140, and 160 mM.

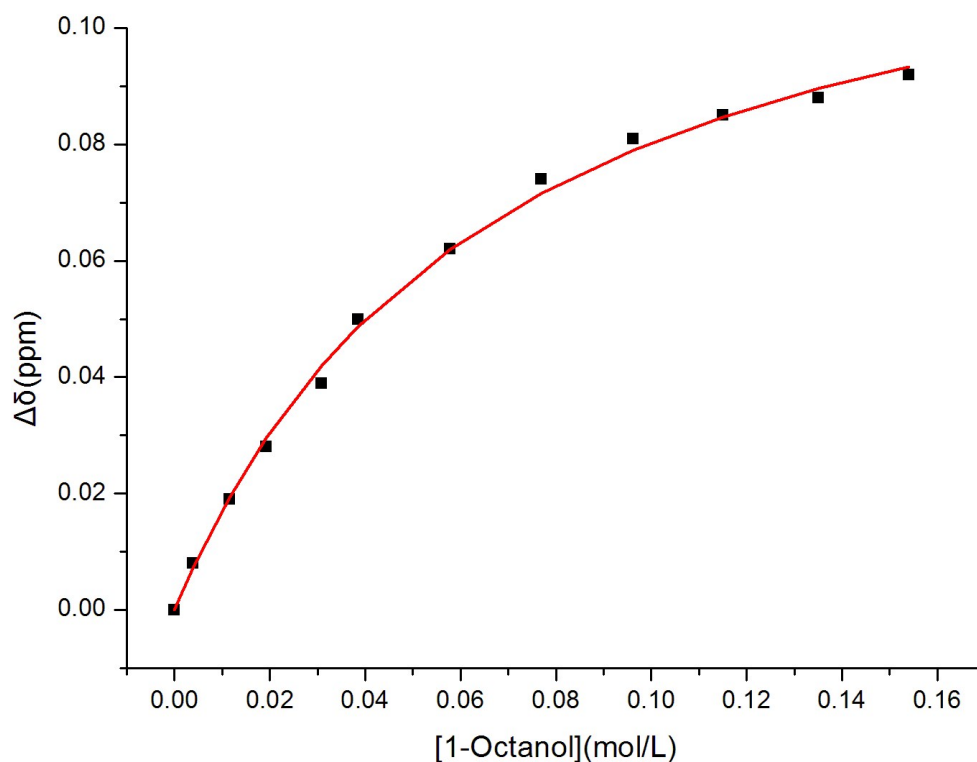

**Figure S36.** The non-linear curve-fitting for the complexation of **3** with **G5**. The non-linear curve-fitting (NMR titrations,  $\Delta\delta$  of  $H_{OBX}$ ) for the complexation of **3** (5.0 mM) with **G5** in  $CDCl_3$  at 298 K. The concentrations of **G5** were 0, 4, 12, 20, 32, 40, 60, 80, 100, 120, 140, 160 mM, respectively. The  $K_a$  value for **G5**  $\subset$  **3** complex in  $CDCl_3$  at 298 K is determined to be  $15.53 \pm 1.02 \text{ M}^{-1}$  (Adj. R-Square: 0.9980).

#### References:

- [1] (a) T. Ogoshi, T. Aoki, K. Kitajima, S. Fujinami, T. A. Yamagishi, Y. Nakamoto, *The J. Org. Chem.* **2011**, 76, 328-331; (b) C. Xie, W. Hu, W. Hu, Y. A. Liu, J. Huo, J. Li, B. Jiang, K. Wen, *Chin. J. Chem.* **2015**, 33, 379-383.
- [2] (a) K. A. Connors, *Binding Constants*, Wiley: New York, **1987**; (b) R. P. Ashton, R. Ballardini, R. V. Balzani, M. Belohradsky, M. T. Gandolfi, D. Philp, L. Prodi, F. M. Raymo, M. V. Reddington, N. Spencer, J. F. Stoddart, M. Venturi, D. J. Williams, *J. Am. Chem. Soc.* **1996**, 118, 4931; (c) Y. Inoue, K. Yamamoto, T. Wada, S. Everitt, X.-M. Gao, Z.-J. Hou, L.-H. Tong, S.-K. Jiang, H.-M. Wu, *J. Chem. Soc., Perkin Trans. 2*, **1998**, 1807.
